# Supplementary material for: Diverse Diets with Consistent Core Microbiome in Wild Bee Pollen Provisions
Source: Insects. 2020 Aug 4;11(8):499. doi: 10.3390/insects11080499 (PMC7469187; doi:10.3390/insects11080499)
Supplement: Supplementary file 1 [file insects-11-00499-s001.xlsx]

## Sheet: S1. rbcl
			Genus ->	Acer	Ailanthus	Ajuga	Albizia	Allium	Alnus	Amsinckia	Aronia	Averrhoa	Betula	Boltonia	Brunia	Camptotheca	Carex	Carpinus	Carya	Castanea	Chionanthus	Cichorium	Cicuta	Citrullus	Citrus	Conyza	Cornus	Crataegus	Crepis	Crotalaria	Cucumis	Daucus	Diodia	Diospyros	Dracocephalum	Elaeagnus	Eleocharis	Galium	Geranium	Gleditsia	Glycine	Gymnocladus	Hedyotis	Hypericum	Hypochaeris	Ilex	Jasminum	Juncus	Lathyrus
Nest_Cell	State	Nesting_substrate	Total Reads	33	283	226	43	39	308	295	7095	257	3153	3212	139360	105705	15	70	223	36	390	2482	4974	51	92	790	73938	4524	110	45	70267	215	64	423832	6576	343	95	3130	38	232589	145	105014	20	155	2225	3442	41	317	5663
M61-01	New_Hampshire	Rhus spp.	56494	0	0	0	0	0	0	0	85	0	0	0	0	0	0	0	0	0	0	0	0	0	0	0	0	65	110	0	0	0	0	0	0	0	0	0	0	677	0	0	0	0	0	0	0	0	0
M61-02	New_Hampshire	Rhus spp.	68391	0	0	0	0	0	0	0	0	0	0	0	0	0	0	0	0	0	0	0	0	0	0	0	99	0	0	0	0	0	0	0	0	0	0	161	0	2010	0	0	0	0	0	0	0	0	0
M61-03	New_Hampshire	Rhus spp.	55379	0	0	0	0	0	0	0	0	0	0	0	0	0	0	0	0	0	0	0	0	0	0	69	228	0	0	0	0	0	0	0	0	0	45	524	0	0	0	0	0	0	0	0	0	0	146
M61-04	New_Hampshire	Rhus spp.	83618	0	0	0	0	0	0	0	0	0	516	0	0	0	0	0	0	0	0	0	0	0	0	0	0	0	0	0	0	0	0	0	0	0	0	0	0	0	0	0	0	31	0	0	0	0	243
M61-05	New_Hampshire	Rhus spp.	82083	0	0	0	0	0	0	0	1020	0	0	0	0	0	0	0	0	0	0	825	0	0	0	0	100	1002	0	0	0	0	0	0	0	343	0	0	0	755	0	0	0	0	0	0	0	0	63
M61-06	New_Hampshire	Rhus spp.	52617	0	0	0	0	0	0	295	76	0	0	0	0	0	0	0	0	0	0	0	0	0	0	0	0	95	0	0	0	0	0	0	0	0	0	0	0	0	112	0	0	0	0	0	0	0	225
M61-07	New_Hampshire	Rhus spp.	87687	0	0	0	0	0	0	0	0	0	0	0	140	0	0	0	0	0	0	0	0	0	0	0	1411	0	0	0	0	0	0	0	0	0	0	0	0	0	0	0	0	0	0	77	0	0	461
M61-08	New_Hampshire	Rhus spp.	85510	0	0	0	0	0	0	0	0	0	162	0	602	0	0	0	0	0	0	0	0	0	0	0	0	0	0	0	0	0	0	0	0	0	0	0	0	0	0	0	0	0	0	0	0	0	0
M63-01	New_Hampshire	Rhus spp.	20799	0	0	0	0	0	0	0	57	52	0	34	0	0	0	0	0	0	0	74	0	0	0	0	1856	84	0	0	0	0	0	0	0	0	0	15	0	0	0	0	0	0	0	0	0	0	0
M63-02	New_Hampshire	Rhus spp.	49053	0	0	0	0	0	0	0	0	0	0	369	0	0	0	0	0	0	0	0	0	0	0	0	8561	0	0	0	0	0	0	0	0	0	0	24	0	0	0	0	0	0	0	0	0	0	0
M63-03	New_Hampshire	Rhus spp.	47498	0	0	0	0	0	0	0	38	0	82	0	0	0	0	70	0	0	0	99	0	0	0	0	13876	0	0	0	0	0	0	0	390	0	0	83	0	0	0	0	0	0	0	0	0	0	70
M63-04	New_Hampshire	Rhus spp.	105940	33	0	0	0	0	0	0	0	0	0	0	0	0	0	0	0	0	0	0	0	0	0	0	80	0	0	0	0	0	0	0	0	0	0	0	0	0	0	0	0	0	0	0	0	0	109
M63-05	New_Hampshire	Rhus spp.	126375	0	0	0	0	0	0	0	433	0	0	0	0	0	0	0	0	0	0	0	0	0	0	0	0	600	0	0	0	0	0	0	0	0	0	0	0	0	0	0	0	0	0	208	0	0	0
M63-06	New_Hampshire	Rhus spp.	92023	0	0	0	0	0	0	0	0	0	0	0	0	0	0	0	0	0	0	0	0	0	0	0	0	0	0	0	0	0	0	0	0	0	0	0	0	0	0	0	0	0	0	0	0	0	0
M63-07	New_Hampshire	Rhus spp.	105583	0	0	0	0	0	0	0	23	0	0	0	0	0	0	0	0	0	0	0	0	0	0	0	0	0	0	0	0	0	0	0	0	0	0	0	0	0	0	0	0	0	0	0	0	0	0
M63-08	New_Hampshire	Rhus spp.	97117	0	0	0	0	0	0	0	81	0	0	0	0	0	0	0	0	0	0	0	0	0	0	0	0	0	0	0	0	0	0	0	0	0	0	0	0	0	0	0	0	0	0	75	0	0	0
M67-01	New_Hampshire	Rhus spp.	40958	0	0	0	0	0	0	0	0	0	0	0	0	0	0	0	0	0	0	0	0	0	0	0	0	0	0	0	0	0	0	0	0	0	0	44	0	46	0	0	0	0	0	0	0	0	160
M67-02	New_Hampshire	Rhus spp.	57338	0	0	0	0	0	0	0	0	0	0	0	0	0	0	0	0	0	0	0	0	0	0	0	0	0	0	0	0	0	0	0	0	0	0	0	0	0	0	0	0	0	0	0	0	0	0
M67-03	New_Hampshire	Rhus spp.	63953	0	0	0	0	0	0	0	0	0	0	0	0	0	0	0	0	0	0	0	0	0	0	0	0	0	0	0	0	0	0	0	0	0	0	0	0	0	0	0	0	0	0	0	0	36	0
M67-04	New_Hampshire	Rhus spp.	61426	0	0	0	0	0	0	0	0	0	0	0	0	0	0	0	0	0	0	0	0	0	0	0	66	0	0	0	0	0	0	0	0	0	0	25	0	134	0	0	0	0	0	0	0	0	0
M67-05	New_Hampshire	Rhus spp.	60603	0	0	0	0	0	0	0	0	0	0	0	0	0	0	0	0	0	0	0	0	0	0	0	3092	0	0	0	0	0	0	0	0	0	0	0	0	0	0	0	0	0	0	0	0	0	24
M67-06	New_Hampshire	Rhus spp.	65357	0	0	0	0	0	0	0	0	0	0	0	0	0	0	0	0	0	0	0	105	0	0	0	0	44	0	0	0	0	0	0	0	0	0	0	0	33	0	0	0	0	0	78	0	0	933
M67-07	New_Hampshire	Rhus spp.	89468	0	0	0	0	0	0	0	0	0	0	0	0	0	0	0	0	0	0	131	0	0	0	0	0	0	0	0	0	0	0	0	0	0	0	0	0	0	0	0	0	0	0	0	0	0	117
M67-08	New_Hampshire	Rhus spp.	64717	0	0	0	0	0	0	0	0	0	0	0	0	0	0	0	0	0	0	0	0	0	0	0	0	65	0	0	0	0	0	0	0	0	0	0	0	0	0	0	0	0	0	48	0	0	15
M67-09	New_Hampshire	Rhus spp.	94015	0	0	0	0	0	113	0	0	0	0	0	0	0	0	0	0	0	0	0	0	0	0	0	0	0	0	0	0	0	0	0	0	0	0	0	0	0	0	0	0	0	0	0	0	0	0
M67-10	New_Hampshire	Rhus spp.	54976	0	0	0	0	0	0	0	20	0	0	0	0	0	0	0	0	0	0	0	55	0	0	0	0	0	0	0	0	0	0	0	0	0	0	0	0	0	0	0	0	0	0	0	0	0	0
M67-11	New_Hampshire	Rhus spp.	43482	0	0	0	0	0	0	0	0	0	0	0	0	0	0	0	0	0	0	0	0	0	0	0	0	0	0	0	0	0	0	0	0	0	0	0	0	0	0	0	0	0	0	0	0	0	0
M67-12	New_Hampshire	Rhus spp.	80109	0	0	0	0	0	0	0	0	0	0	0	0	0	0	0	0	0	0	0	0	0	0	0	0	0	0	0	0	0	0	0	0	0	0	0	0	0	0	0	0	0	0	0	0	0	0
M68-04	New_Hampshire	Rhus spp.	48570	0	0	0	0	0	0	0	0	0	0	0	0	0	0	0	0	0	0	0	0	0	0	0	0	0	0	0	0	0	0	0	0	0	0	0	0	153	0	0	0	0	0	0	0	0	0
M70-01	New_Hampshire	Rhus spp.	90996	0	0	0	0	0	0	0	1322	0	0	0	0	0	0	0	0	0	0	0	0	0	0	0	166	1667	0	0	0	0	0	0	0	0	0	0	0	0	0	0	0	0	0	0	0	0	0
M70-02	New_Hampshire	Rhus spp.	95153	0	0	0	0	0	0	0	0	0	1526	0	0	0	0	0	0	0	0	0	0	0	0	0	0	0	0	0	0	0	0	0	0	0	0	0	0	0	0	0	0	0	0	0	0	0	98
M70-03	New_Hampshire	Rhus spp.	53732	0	0	0	0	0	0	0	78	0	0	0	0	101	0	0	0	0	0	0	164	0	0	0	120	0	0	0	0	0	0	0	0	0	0	0	0	0	0	0	0	0	0	96	0	0	0
M70-04	New_Hampshire	Rhus spp.	82161	0	0	0	0	0	0	0	0	0	0	0	0	79	0	0	0	0	0	210	98	0	0	0	0	0	0	0	0	0	0	0	0	0	0	0	0	0	0	0	0	0	0	0	0	0	0
M70-05	New_Hampshire	Rhus spp.	72253	0	0	0	0	0	0	0	0	0	0	0	0	0	0	0	0	0	0	0	104	0	0	0	0	0	0	0	0	0	0	0	0	0	0	808	0	0	0	0	0	0	0	0	0	0	0
M70-06	New_Hampshire	Rhus spp.	76120	0	0	0	0	0	0	0	0	0	0	0	0	0	0	0	0	0	0	0	0	0	0	0	55	0	0	0	0	0	0	0	89	0	0	0	0	0	0	0	0	23	0	0	0	0	0
M70-07	New_Hampshire	Rhus spp.	87273	0	0	0	0	0	0	0	644	0	0	0	0	0	0	0	0	0	0	0	0	0	0	0	0	0	0	0	0	0	0	0	0	0	0	0	0	0	0	0	0	0	0	0	0	0	0
M73-01	New_Hampshire	Rhus spp.	85688	0	0	226	0	0	0	0	40	0	0	0	0	276	0	0	0	0	0	0	515	0	0	0	4194	0	0	0	0	0	0	0	0	0	0	0	0	0	0	0	0	0	0	0	0	197	0
M73-02	New_Hampshire	Rhus spp.	76929	0	0	0	0	0	0	0	633	0	0	0	0	0	0	0	0	0	0	0	75	0	0	0	2584	495	0	0	0	0	0	0	0	0	0	0	0	0	0	0	0	0	0	222	0	0	448
M73-03	New_Hampshire	Rhus spp.	92902	0	0	0	0	0	0	0	0	0	0	0	0	0	0	0	0	0	0	0	0	0	0	0	0	0	0	0	0	0	0	0	0	0	0	0	0	0	0	0	0	0	0	0	0	0	344
M73-05	New_Hampshire	Rhus spp.	105571	0	0	0	0	0	0	0	0	0	0	0	0	0	0	0	0	0	0	0	0	0	0	39	51	0	0	0	0	0	0	0	0	0	0	0	0	0	0	0	0	0	0	0	0	0	0
M75-02	New_Hampshire	Rhus spp.	31062	0	0	0	0	0	0	0	0	0	0	0	0	0	0	0	0	0	0	0	0	0	0	0	0	0	0	0	0	0	0	0	0	0	11	0	0	37	0	0	0	0	0	0	0	0	0
M75-03	New_Hampshire	Rhus spp.	75944	0	0	0	0	0	0	0	0	0	0	0	0	0	0	0	0	0	0	119	0	0	0	0	0	0	0	0	0	0	0	0	0	0	0	0	0	0	0	0	0	0	0	0	0	0	0
M75-04	New_Hampshire	Rhus spp.	50008	0	0	0	0	0	0	0	0	0	0	0	0	0	0	0	0	0	0	71	0	0	0	0	64	0	0	0	0	0	0	0	0	0	0	22	0	0	0	0	0	0	0	0	0	0	171
M75-05	New_Hampshire	Rhus spp.	45599	0	0	0	0	0	0	0	0	0	0	0	0	0	0	0	0	0	0	0	0	0	0	0	0	0	0	0	0	0	0	0	0	0	0	0	0	0	0	0	0	0	0	0	0	0	0
M75-06	New_Hampshire	Rhus spp.	57396	0	0	0	0	0	0	0	0	0	0	0	0	0	0	0	0	0	0	0	0	0	0	0	0	0	0	0	0	0	0	0	0	0	0	0	0	0	0	0	0	0	0	0	0	0	0
M75-07	New_Hampshire	Rhus spp.	82923	0	0	0	0	0	0	0	0	0	0	0	0	0	0	0	0	0	0	0	0	0	0	0	915	0	0	0	0	0	0	0	0	0	0	0	0	0	0	0	0	0	0	0	0	0	0
M75-08	New_Hampshire	Rhus spp.	117790	0	0	0	0	0	0	0	0	0	0	0	0	0	0	0	0	0	0	0	0	0	0	0	0	0	0	0	0	0	0	0	0	0	0	0	0	0	0	0	0	0	0	0	0	0	0
M75-09	New_Hampshire	Rhus spp.	101915	0	0	0	0	0	0	0	717	0	0	0	0	0	0	0	0	0	0	0	0	0	0	0	0	0	0	0	0	0	0	0	0	0	0	0	0	0	0	0	0	0	0	832	0	0	0
M75-10	New_Hampshire	Rhus spp.	118663	0	48	0	0	0	0	0	0	0	0	0	0	177	0	0	0	0	0	0	96	0	0	0	0	0	0	0	0	0	0	0	0	0	0	0	0	0	0	0	0	0	0	64	0	0	0
M75-11	New_Hampshire	Rhus spp.	97874	0	0	0	0	0	0	0	0	0	0	0	0	0	0	0	0	0	0	0	0	0	0	0	0	0	0	0	0	0	0	0	0	0	0	0	0	0	0	0	0	0	0	0	0	0	0
M76-01	New_Hampshire	Rhus spp.	48406	0	0	0	0	0	0	0	0	0	0	0	0	0	0	0	0	0	0	52	0	0	0	0	0	0	0	0	0	0	0	0	0	0	39	24	0	0	0	0	0	0	0	0	0	0	80
M76-02	New_Hampshire	Rhus spp.	48481	0	0	0	0	0	0	0	0	0	0	0	0	0	0	0	0	0	0	0	0	0	0	0	0	0	0	0	0	0	0	0	0	0	0	0	0	0	0	0	0	0	0	0	0	0	0
M76-03	New_Hampshire	Rhus spp.	60262	0	0	0	0	0	0	0	0	0	0	0	0	0	0	0	0	0	0	0	0	0	0	0	0	0	0	0	0	0	0	0	0	0	0	0	0	0	0	0	0	0	0	0	0	0	0
M76-04	New_Hampshire	Rhus spp.	37378	0	0	0	0	0	0	0	0	0	0	0	0	0	0	0	0	0	0	0	0	0	0	0	55	0	0	0	0	0	0	0	0	0	0	0	0	0	0	0	0	0	0	0	0	0	0
M76-05	New_Hampshire	Rhus spp.	31615	0	0	0	0	0	0	0	0	0	0	0	0	0	0	0	0	0	0	0	0	0	0	0	381	0	0	0	0	0	0	0	0	0	0	0	0	72	0	0	0	0	0	0	0	0	0
M76-06	New_Hampshire	Rhus spp.	59191	0	0	0	0	0	0	0	0	0	0	0	0	0	0	0	0	0	0	101	0	0	0	0	157	0	0	0	0	0	0	0	0	0	0	0	0	0	0	0	0	0	0	0	0	0	0
M76-07	New_Hampshire	Rhus spp.	51373	0	0	0	0	0	0	0	0	0	0	0	0	0	0	0	0	0	0	0	0	0	0	0	0	0	0	0	0	0	0	0	0	0	0	181	0	0	0	0	0	0	0	0	0	0	0
M76-08	New_Hampshire	Rhus spp.	82166	0	0	0	0	0	0	0	0	0	0	0	0	0	0	0	0	0	0	0	0	0	92	0	0	0	0	0	0	0	0	0	0	0	0	0	0	0	33	0	0	0	0	0	0	0	0
M76-09	New_Hampshire	Rhus spp.	83105	0	0	0	0	0	0	0	0	0	0	0	0	0	0	0	0	0	0	0	0	0	0	0	0	0	0	0	0	0	0	0	0	0	0	0	0	0	0	0	0	0	0	0	0	0	0
M76-10	New_Hampshire	Rhus spp.	62901	0	0	0	0	0	0	0	0	0	0	0	0	0	0	0	0	0	0	0	0	0	0	0	452	0	0	0	0	0	0	0	0	0	0	0	0	0	0	0	0	0	0	0	0	0	0
M76-11	New_Hampshire	Rhus spp.	78182	0	0	0	0	0	0	0	0	0	0	0	0	0	0	0	0	0	0	135	0	0	0	0	0	0	0	0	0	0	0	0	0	0	0	0	0	0	0	0	0	0	0	0	0	0	0
M76-12	New_Hampshire	Rhus spp.	108200	0	0	0	0	0	0	0	0	0	0	0	0	0	0	0	0	0	0	0	0	0	0	0	0	0	0	0	0	38	0	0	0	0	0	0	0	0	0	0	0	0	0	0	0	0	0
M77-01	New_Hampshire	Rhus spp.	65620	0	0	0	0	0	0	0	0	0	0	0	0	0	0	0	0	0	0	0	0	0	0	0	96	0	0	0	0	0	0	0	0	0	0	0	0	0	0	0	0	0	0	0	0	0	0
M77-02	New_Hampshire	Rhus spp.	56241	0	0	0	0	0	0	0	0	0	0	0	0	0	0	0	0	0	0	0	0	0	0	0	0	0	0	0	0	0	0	0	0	0	0	0	0	0	0	0	0	0	0	0	0	0	0
M77-03	New_Hampshire	Rhus spp.	52521	0	0	0	0	0	0	0	0	0	0	0	0	0	0	0	0	0	0	0	0	0	0	0	98	0	0	0	0	0	0	0	0	0	0	0	0	0	0	0	0	0	0	0	0	0	0
M77-04	New_Hampshire	Rhus spp.	44237	0	0	0	0	0	0	0	0	0	0	0	0	0	0	0	0	0	0	0	0	0	0	0	0	0	0	0	0	0	0	0	0	0	0	0	0	0	0	0	0	0	0	0	0	0	0
M77-05	New_Hampshire	Rhus spp.	27073	0	0	0	0	0	0	0	25	0	0	0	0	0	0	0	0	0	0	0	0	0	0	0	0	0	0	0	0	0	0	0	0	0	0	0	0	0	0	0	0	0	0	0	0	0	0
M77-06	New_Hampshire	Rhus spp.	42967	0	0	0	0	0	0	0	0	0	0	0	0	0	0	0	0	0	0	115	0	0	0	0	70	0	0	0	0	0	0	0	0	0	0	0	0	0	0	0	0	0	0	0	0	0	0
M77-08	New_Hampshire	Rhus spp.	52745	0	0	0	0	0	28	0	100	0	0	0	0	0	0	0	0	0	0	52	0	0	0	0	1002	171	0	0	0	0	0	0	0	0	0	51	0	340	0	0	0	0	0	0	0	0	0
M77-09	New_Hampshire	Rhus spp.	36162	0	0	0	0	0	106	0	0	0	0	0	0	0	0	0	0	0	0	0	0	0	0	0	467	0	0	0	0	0	0	0	0	0	0	232	0	221	0	0	0	0	0	0	0	0	0
M77-10	New_Hampshire	Rhus spp.	94041	0	0	0	0	0	0	0	0	0	818	0	0	0	0	0	0	0	0	0	0	0	0	0	151	0	0	0	0	0	0	0	0	0	0	0	0	0	0	0	0	0	0	0	0	0	0
M77-11	New_Hampshire	Rhus spp.	93415	0	0	0	0	0	0	0	171	0	0	0	0	90	0	0	0	0	0	0	96	0	0	0	0	0	0	0	0	0	0	0	0	0	0	0	0	0	0	0	0	0	0	211	0	0	0
M77-12	New_Hampshire	Rhus spp.	107584	0	0	0	0	0	0	0	0	0	0	0	0	174	0	0	0	0	0	0	155	0	0	0	0	0	0	0	0	0	0	0	0	0	0	0	0	0	0	0	0	0	0	0	0	0	231
M77-13	New_Hampshire	Rhus spp.	85795	0	0	0	0	0	0	0	0	0	0	0	0	433	0	0	0	0	0	0	425	0	0	0	0	0	0	0	0	0	0	0	0	0	0	0	0	90	0	0	0	0	0	0	0	0	130
M77-15	New_Hampshire	Rhus spp.	103863	0	0	0	0	0	0	0	0	0	0	134	452	485	0	0	0	0	0	0	540	0	0	0	0	0	0	0	0	0	0	0	0	0	0	0	0	0	0	0	0	0	0	0	0	0	0
M78-01	New_Hampshire	Rhus spp.	37103	0	0	0	0	0	0	0	0	0	0	0	0	0	0	0	0	0	0	0	0	0	0	0	0	0	0	0	0	0	0	0	0	0	0	0	0	83	0	0	0	0	0	0	0	0	0
M78-11	New_Hampshire	Rhus spp.	99526	0	0	0	0	0	0	0	47	0	0	0	0	0	0	0	0	0	0	0	0	0	0	0	244	0	0	0	0	0	0	0	0	0	0	0	0	0	0	0	0	0	0	39	0	0	0
M80-01	New_Hampshire	Rhus spp.	47763	0	0	0	0	0	0	0	0	0	0	0	0	0	0	0	0	0	0	0	0	0	0	0	2852	0	0	0	0	0	0	0	0	0	0	0	0	0	0	0	0	0	0	0	0	0	174
M80-02	New_Hampshire	Rhus spp.	50640	0	0	0	0	0	47	0	0	0	0	0	0	0	0	0	0	0	0	0	0	0	0	0	6112	0	0	0	0	0	0	0	0	0	0	126	0	0	0	0	0	0	0	0	0	0	0
M80-03	New_Hampshire	Rhus spp.	65400	0	0	0	0	0	0	0	0	0	0	0	0	0	0	0	0	0	0	0	0	0	0	0	9426	0	0	0	0	0	0	0	0	0	0	199	0	44	0	0	0	0	0	0	0	0	74
M80-04	New_Hampshire	Rhus spp.	72804	0	0	0	0	0	0	0	63	0	0	0	0	0	0	0	0	0	0	0	0	0	0	65	4118	0	0	0	0	0	0	0	0	0	0	0	0	0	0	0	0	0	0	84	0	84	510
M80-05	New_Hampshire	Rhus spp.	90699	0	0	0	0	0	0	0	332	0	0	0	0	1638	0	0	0	0	0	0	1636	0	0	49	3714	188	0	0	0	0	0	0	0	0	0	0	0	0	0	0	0	0	0	184	0	0	0
M80-06	New_Hampshire	Rhus spp.	82853	0	0	0	0	0	0	0	233	0	0	0	381	232	0	0	0	0	0	0	255	0	0	0	1187	0	0	0	0	0	0	0	0	0	0	0	0	0	0	0	0	0	0	249	0	0	133
M81-01	New_Hampshire	Rhus spp.	62618	0	0	0	0	0	0	0	0	0	0	0	0	0	0	0	0	0	0	0	0	0	0	0	138	0	0	0	0	0	0	0	0	0	0	0	0	89	0	0	0	0	0	0	0	0	0
M81-02	New_Hampshire	Rhus spp.	94389	0	0	0	0	0	0	0	0	0	0	0	0	0	0	0	0	0	0	0	0	0	0	0	0	0	0	0	0	0	0	0	0	0	0	0	0	71	0	0	0	0	0	0	0	0	0
M81-03	New_Hampshire	Rhus spp.	63451	0	0	0	0	0	0	0	0	0	0	0	0	0	0	0	0	0	0	0	0	0	0	0	0	0	0	0	0	0	0	0	0	0	0	0	0	0	0	0	0	0	0	0	0	0	0
M81-04	New_Hampshire	Rhus spp.	62084	0	0	0	0	0	0	0	0	0	0	0	0	0	0	0	0	0	0	0	0	0	0	0	164	0	0	0	0	0	0	0	0	0	0	30	0	0	0	0	0	0	0	0	0	0	0
M81-05	New_Hampshire	Rhus spp.	62861	0	0	0	0	0	0	0	0	0	49	0	0	0	0	0	0	0	0	0	0	0	0	38	976	0	0	0	0	0	0	0	0	0	0	80	0	46	0	0	0	0	0	0	0	0	47
M81-06	New_Hampshire	Rhus spp.	85607	0	0	0	0	0	0	0	0	0	0	0	0	271	0	0	0	0	0	0	360	0	0	0	0	0	0	0	0	0	0	0	0	0	0	0	0	332	0	0	0	0	0	0	0	0	139
M81-08	New_Hampshire	Rhus spp.	76869	0	0	0	0	0	0	0	0	0	0	0	0	0	0	0	0	0	0	0	0	0	0	0	0	0	0	0	0	0	0	0	0	0	0	0	0	0	0	0	0	0	0	0	0	0	472
M81-09	New_Hampshire	Rhus spp.	95851	0	0	0	0	0	0	0	83	0	0	0	0	97	0	0	0	0	0	91	118	0	0	0	0	0	0	0	0	0	0	0	0	0	0	0	0	0	0	0	0	59	0	80	0	0	46
M81-10	New_Hampshire	Rhus spp.	56804	0	0	0	0	0	0	0	0	0	0	0	150	0	0	0	0	0	0	0	0	0	0	0	0	0	0	0	0	0	0	0	0	0	0	0	0	0	0	0	0	0	0	0	0	0	0
M81-11	New_Hampshire	Rhus spp.	82220	0	0	0	0	0	0	0	308	0	0	0	5446	0	0	0	0	0	0	0	0	0	0	0	4472	0	0	0	0	0	0	0	0	0	0	0	0	28	0	0	0	0	0	330	0	0	0
M81-12	New_Hampshire	Rhus spp.	95472	0	0	0	0	0	0	0	466	0	0	0	853	143	0	0	124	0	0	0	150	0	0	0	88	0	0	0	0	0	0	0	536	0	0	0	0	0	0	0	0	0	0	565	0	0	0
G16010_7	Georgia	Rubus spp.	45875	0	0	0	0	0	0	0	0	0	0	0	7784	6302	0	0	0	0	29	0	0	0	0	0	0	48	0	0	0	0	0	35	0	0	0	0	0	0	0	0	0	0	0	0	0	0	0
G16010_10	Georgia	Rubus spp.	41284	0	0	0	0	0	0	0	0	0	0	0	10809	8319	0	0	0	0	47	0	0	0	0	0	0	0	0	0	0	0	0	73	0	0	0	0	0	0	0	0	0	0	0	0	0	0	0
G16010_11	Georgia	Rubus spp.	29754	0	0	0	0	0	0	0	0	0	0	0	8276	6058	0	0	0	0	34	0	0	0	0	0	0	0	0	0	0	0	0	23	0	0	0	0	0	0	0	0	0	0	0	0	0	0	0
G16013_3	Georgia	Rubus spp.	48157	0	0	0	0	0	0	0	0	0	0	0	65	61	0	0	0	0	0	0	0	0	0	0	0	0	0	0	0	0	0	291	0	0	0	0	0	20019	0	9532	0	0	0	0	0	0	0
G16013_5	Georgia	Rubus spp.	40721	0	0	0	0	0	0	0	0	0	0	0	0	0	0	0	0	0	0	0	0	0	0	0	0	0	0	0	0	0	0	172	0	0	0	0	0	0	0	0	0	0	0	0	0	0	0
G16013_6	Georgia	Rubus spp.	41980	0	0	0	0	0	0	0	0	0	0	0	64	55	0	0	0	0	0	0	0	0	0	0	0	0	0	0	0	0	0	163	0	0	0	0	0	0	0	0	0	0	0	0	0	0	0
G16013_7	Georgia	Rubus spp.	19662	0	0	0	0	0	0	0	0	0	0	0	64	43	0	0	0	0	0	0	0	0	0	0	0	0	0	0	0	0	0	88	0	0	0	0	0	0	0	0	0	0	0	0	0	0	0
G16013_11	Georgia	Rubus spp.	24712	0	0	0	0	0	0	0	0	0	0	0	837	672	0	0	0	0	0	0	0	0	0	0	0	0	0	0	0	0	0	0	0	0	0	0	0	0	0	0	0	0	0	0	0	0	0
G16013_12	Georgia	Rubus spp.	26882	0	0	0	0	0	0	0	0	0	0	0	2258	1635	0	0	0	0	0	0	0	0	0	0	0	0	0	0	0	0	0	0	0	0	0	0	0	0	0	0	0	0	0	0	0	0	0
G16013_13	Georgia	Rubus spp.	35303	0	0	0	0	0	0	0	0	0	0	0	3393	2340	0	0	0	0	0	0	0	0	0	0	0	0	0	0	0	0	0	0	0	0	0	0	0	0	0	0	0	0	0	0	0	0	0
G16013_14	Georgia	Rubus spp.	24373	0	0	0	0	0	0	0	0	0	0	0	463	405	0	0	0	0	0	0	0	0	0	0	0	0	0	0	0	0	0	0	0	0	0	0	0	0	0	0	0	0	0	0	0	0	0
G16013_18	Georgia	Rubus spp.	43069	0	0	0	0	0	0	0	0	0	0	0	3006	2104	0	0	0	0	0	0	0	0	0	108	0	0	0	0	0	0	0	13746	0	0	0	0	0	25	0	0	0	0	0	0	0	0	0
G16021_4	Georgia	Rubus spp.	37548	0	0	0	0	0	0	0	0	0	0	0	0	0	0	0	0	0	0	0	0	0	0	0	0	0	0	0	0	0	0	0	0	0	0	0	0	0	0	0	0	0	0	0	0	0	0
G16021_10	Georgia	Rubus spp.	40180	0	0	0	0	0	0	0	0	0	0	0	0	0	0	0	0	0	0	0	0	0	0	0	0	0	0	0	0	0	0	0	0	0	0	0	0	0	0	0	0	0	0	0	0	0	0
G16021_12	Georgia	Rubus spp.	50074	0	0	0	0	0	14	0	0	0	0	0	0	0	0	0	0	0	0	0	0	0	0	0	0	0	0	0	0	0	0	0	0	0	0	0	0	0	0	0	0	0	0	0	0	0	0
G16021_13	Georgia	Rubus spp.	33990	0	0	0	0	0	0	0	0	0	0	0	965	724	0	0	0	0	0	0	0	0	0	0	0	0	0	0	0	0	0	76	0	0	0	0	0	0	0	0	0	0	86	0	0	0	0
G16033_6	Georgia	Rubus spp.	39276	0	0	0	0	0	0	0	0	0	0	0	5245	4211	0	0	0	0	39	0	0	0	0	0	0	0	0	0	0	0	0	18	0	0	0	0	0	0	0	0	0	0	69	0	0	0	0
G16033_15	Georgia	Rubus spp.	35870	0	0	0	0	0	0	0	0	0	0	0	4219	3199	0	0	0	0	19	0	0	0	0	0	0	0	0	0	0	0	0	12180	0	0	0	0	0	0	0	0	0	0	344	0	0	0	0
G16081_4	Georgia	Rubus spp.	36183	0	0	0	0	0	0	0	0	0	0	0	276	172	0	0	0	0	0	0	0	0	0	0	0	0	0	0	0	0	0	334	0	0	0	0	0	0	0	0	0	0	0	0	0	0	0
G16081_8	Georgia	Rubus spp.	37629	0	0	0	0	0	0	0	0	0	0	62	0	0	0	0	0	0	0	0	0	0	0	23	0	0	0	0	0	0	0	10893	0	0	0	0	0	0	0	0	0	0	0	0	0	0	0
G16089_10	Georgia	Rubus spp.	46631	0	0	0	0	0	0	0	0	0	0	0	35	44	0	0	0	0	0	0	0	0	0	0	0	0	0	0	0	0	0	0	0	0	0	0	0	0	0	0	0	0	0	0	0	0	0
G16093_10	Georgia	Rubus spp.	28543	0	0	0	0	0	0	0	0	0	0	0	194	102	0	0	0	0	0	0	0	0	0	0	0	0	0	0	0	0	0	166	0	0	0	0	0	0	0	0	0	0	0	0	0	0	0
G16126_9	Georgia	Rubus spp.	40080	0	0	0	0	0	0	0	0	0	0	0	1582	1241	0	0	0	0	0	0	0	0	0	0	0	0	0	0	0	0	0	0	0	0	0	0	0	0	0	0	0	0	0	0	0	0	0
G16127_8	Georgia	Rubus spp.	47615	0	0	0	0	0	0	0	0	0	0	0	0	0	0	0	0	0	0	0	0	0	0	0	0	0	0	0	0	0	0	0	0	0	0	0	0	0	0	0	0	0	0	0	0	0	0
G16127_11	Georgia	Rubus spp.	54047	0	0	0	0	0	0	0	0	0	0	0	0	0	0	0	0	0	0	0	0	0	0	0	0	0	0	0	0	0	0	0	0	0	0	0	0	0	0	0	0	0	12	0	0	0	0
G16136_4	Georgia	Rubus spp.	84725	0	0	0	43	0	0	0	0	0	0	0	100	83	15	0	0	0	0	0	22	0	0	79	0	0	0	0	0	42	0	80609	0	0	0	0	0	260	0	106	0	0	110	0	0	0	0
G16136_5	Georgia	Rubus spp.	44823	0	0	0	0	0	0	0	0	0	0	0	99	77	0	0	0	36	0	0	0	0	0	62	0	0	0	0	0	15	0	38158	0	0	0	0	0	241	0	117	0	0	118	0	0	0	0
G16136_8	Georgia	Rubus spp.	30770	0	0	0	0	0	0	0	0	0	0	0	9489	7474	0	0	0	0	0	0	0	0	0	0	0	0	0	0	0	26	0	23	0	0	0	0	0	298	0	141	0	0	687	0	0	0	0
G16149_1	Georgia	Rubus spp.	22019	0	0	0	0	0	0	0	0	0	0	0	90	75	0	0	0	0	0	0	0	0	0	0	0	0	0	0	0	0	0	15	0	0	0	0	0	0	0	0	0	0	0	0	0	0	0
G16153_3	Georgia	Rubus spp.	41555	0	0	0	0	0	0	0	0	0	0	0	0	0	0	0	0	0	0	0	0	0	0	0	0	0	0	0	0	0	0	0	0	0	0	0	0	26939	0	12903	0	0	0	0	0	0	0
G16180_6	Georgia	Rubus spp.	20574	0	0	0	0	0	0	0	0	0	0	0	0	0	0	0	0	0	0	0	0	0	0	0	0	0	0	0	0	0	0	8	0	0	0	0	0	0	0	0	0	0	0	0	0	0	0
G16220_7	Georgia	Rubus spp.	44681	0	0	0	0	0	0	0	0	0	0	0	9543	7953	0	0	12	0	70	0	0	0	0	0	0	0	0	0	0	0	0	0	0	0	0	0	0	0	0	0	0	0	0	0	0	0	0
G16310_6	Georgia	Rubus spp.	72476	0	26	0	0	0	0	0	0	0	0	0	56	0	0	0	0	0	0	0	0	0	0	0	0	0	0	0	0	0	0	0	0	0	0	0	0	0	0	0	0	0	0	0	0	0	0
G16310_7	Georgia	Rubus spp.	37595	0	30	0	0	0	0	0	0	0	0	0	44	0	0	0	0	0	0	0	5	0	0	0	0	0	0	0	0	0	0	10	0	0	0	0	0	0	0	0	0	0	18	0	0	0	0
G16481_1	Georgia	Rubus spp.	71650	0	0	0	0	0	0	0	0	0	0	0	55	0	0	0	0	0	0	0	0	51	0	0	0	0	0	0	70267	0	64	0	0	0	0	0	0	0	0	0	20	0	0	0	0	0	0
G16004_1	Georgia	Rhus spp.	51263	0	0	0	0	0	0	0	0	0	0	0	0	0	0	0	0	0	0	0	0	0	0	0	0	0	0	0	0	0	0	0	0	0	0	0	38	0	0	0	0	0	0	0	0	0	0
G16004_2	Georgia	Rhus spp.	37969	0	0	0	0	0	0	0	0	0	0	0	0	0	0	0	0	0	0	0	0	0	0	0	0	0	0	0	0	0	0	0	0	0	0	0	0	0	0	0	0	0	0	0	0	0	0
G16004_3	Georgia	Rhus spp.	46865	0	0	0	0	0	0	0	0	0	0	0	0	0	0	0	0	0	0	0	0	0	0	0	0	0	0	0	0	0	0	0	0	0	0	0	0	0	0	0	0	0	0	0	0	0	0
G16004_9	Georgia	Rhus spp.	87645	0	0	0	0	0	0	0	0	0	0	0	0	0	0	0	0	0	0	0	0	0	0	0	0	0	0	0	0	0	0	1220	0	0	0	0	0	0	0	0	0	0	0	0	0	0	0
G16004_11	Georgia	Rhus spp.	34249	0	0	0	0	0	0	0	0	0	0	0	0	0	0	0	0	0	0	0	0	0	0	0	0	0	0	0	0	0	0	131	0	0	0	0	0	0	0	0	0	0	0	0	0	0	0
G16007_11	Georgia	Rhus spp.	37858	0	0	0	0	0	0	0	0	0	0	0	0	0	0	0	0	0	0	0	0	0	0	0	0	0	0	0	0	0	0	0	0	0	0	0	0	0	0	0	0	0	0	0	0	0	0
G16016_8	Georgia	Rhus spp.	36073	0	0	0	0	0	0	0	0	0	0	0	0	0	0	0	10	0	0	0	0	0	0	0	0	0	0	0	0	0	0	0	0	0	0	501	0	0	0	0	0	0	0	0	0	0	0
G16036_2	Georgia	Rhus spp.	45151	0	0	0	0	0	0	0	0	0	0	0	0	0	0	0	0	0	0	0	0	0	0	0	0	0	0	0	0	0	0	0	0	0	0	0	0	0	0	0	0	0	0	0	0	0	0
G16036_3	Georgia	Rhus spp.	45765	0	0	0	0	0	0	0	0	0	0	0	0	0	0	0	0	0	0	0	0	0	0	0	0	0	0	0	0	0	0	0	0	0	0	0	0	0	0	0	0	0	0	0	0	0	0
G16036_6	Georgia	Rhus spp.	47017	0	0	0	0	0	0	0	0	0	0	0	0	0	0	0	0	0	0	0	0	0	0	0	0	0	0	0	0	0	0	0	0	0	0	0	0	0	0	0	0	0	0	0	0	0	0
G16037_13	Georgia	Rhus spp.	86126	0	0	0	0	0	0	0	0	0	0	0	7076	5300	0	0	57	0	0	370	0	0	0	0	0	0	0	0	0	0	0	0	0	0	0	0	0	0	0	0	0	0	752	0	0	0	0
G16037_16	Georgia	Rhus spp.	50007	0	37	0	0	0	0	0	0	0	0	0	944	833	0	0	0	0	0	0	0	0	0	0	0	0	0	0	0	0	0	0	0	0	0	0	0	0	0	0	0	0	0	0	0	0	0
G16038_3	Georgia	Rhus spp.	31222	0	0	0	0	0	0	0	0	0	0	0	1490	1192	0	0	0	0	0	0	0	0	0	0	0	0	0	0	0	0	0	0	0	0	0	0	0	5751	0	2757	0	0	0	0	0	0	0
G16038_4	Georgia	Rhus spp.	28892	0	0	0	0	0	0	0	0	0	0	0	83	73	0	0	0	0	0	0	0	0	0	0	0	0	0	0	0	0	0	0	0	0	0	0	0	11015	0	4943	0	0	0	0	0	0	0
G16038_5	Georgia	Rhus spp.	43897	0	0	0	0	0	0	0	0	0	0	0	2371	1902	0	0	0	0	0	0	0	0	0	0	0	0	0	0	0	0	0	0	0	0	0	0	0	18017	0	8786	0	0	0	0	0	0	0
G16038_6	Georgia	Rhus spp.	32232	0	0	0	0	0	0	0	0	0	0	0	5161	3856	0	0	0	0	0	0	0	0	0	0	0	0	0	0	0	0	0	0	0	0	0	0	0	8276	0	3612	0	0	0	0	0	0	0
G16038_7	Georgia	Rhus spp.	45071	0	0	0	0	0	0	0	0	0	0	0	5619	4727	0	0	0	0	0	0	0	0	0	0	0	0	0	0	0	0	0	0	0	0	0	0	0	13352	0	6526	0	0	0	0	0	0	0
G16038_10	Georgia	Rhus spp.	83017	0	0	0	0	0	0	0	0	0	0	0	11354	8906	0	0	20	0	81	0	0	0	0	0	0	0	0	0	0	0	0	0	0	0	0	0	0	0	0	0	0	0	0	0	0	0	0
G16038_12	Georgia	Rhus spp.	41171	0	0	0	0	0	0	0	0	0	0	0	7627	6120	0	0	0	0	46	0	0	0	0	0	0	0	0	0	0	0	0	0	0	0	0	0	0	0	0	0	0	0	0	0	0	0	0
G16039_4	Georgia	Rhus spp.	61703	0	0	0	0	0	0	0	0	0	0	0	0	0	0	0	0	0	0	0	0	0	0	0	0	0	0	0	0	0	0	0	0	0	0	0	0	0	0	0	0	0	0	0	0	0	0
G16039_9	Georgia	Rhus spp.	54966	0	0	0	0	0	0	0	0	0	0	0	4856	3560	0	0	0	0	0	0	0	0	0	0	0	0	0	0	0	0	0	0	0	0	0	0	0	15084	0	7092	0	0	0	0	0	0	0
G16050_7	Georgia	Rhus spp.	57949	0	0	0	0	0	0	0	0	0	0	122	0	0	0	0	0	0	0	0	0	0	0	0	0	0	0	0	0	0	0	469	0	0	0	0	0	0	0	0	0	0	0	0	0	0	0
MO197_16	Missouri	Rhus spp.	39368	0	0	0	0	0	0	0	0	0	0	99	1165	886	0	0	0	0	0	0	0	0	0	0	0	0	0	0	0	0	0	32321	0	0	0	0	0	50	0	0	0	0	0	0	0	0	0
MO205_4	Missouri	Rhus spp.	29818	0	0	0	0	39	0	0	0	0	0	0	2296	1825	0	0	0	0	0	37	0	0	0	0	0	0	0	45	0	0	0	2985	1892	0	0	0	0	0	0	0	0	0	0	0	41	0	0
MO205_9	Missouri	Rhus spp.	17491	0	0	0	0	0	0	0	0	43	0	0	840	540	0	0	0	0	0	0	0	0	0	0	0	0	0	0	0	0	0	1229	283	0	0	0	0	0	0	0	0	0	0	0	0	0	0
MO205_10	Missouri	Rhus spp.	35451	0	0	0	0	0	0	0	0	90	0	0	2085	1607	0	0	0	0	0	0	0	0	0	0	0	0	0	0	0	0	0	2162	189	0	0	0	0	0	0	0	0	42	0	0	0	0	0
MO205_11	Missouri	Rhus spp.	25630	0	0	0	0	0	0	0	0	0	0	0	1883	1359	0	0	0	0	0	0	0	0	0	0	0	0	0	0	0	0	0	2832	3197	0	0	0	0	0	0	0	0	0	0	0	0	0	0
MO218_3	Missouri	Rhus spp.	26013	0	0	0	0	0	0	0	0	0	0	0	55	38	0	0	0	0	0	0	0	0	0	0	0	0	0	0	0	0	0	62	0	0	0	0	0	14369	0	6233	0	0	0	0	0	0	0
MO218_6	Missouri	Rhus spp.	39304	0	0	0	0	0	0	0	0	0	0	319	520	396	0	0	0	0	0	0	0	0	0	79	0	0	0	0	0	0	0	988	0	0	0	0	0	22339	0	9632	0	0	0	0	0	0	0
MO218_10	Missouri	Rhus spp.	54129	0	0	0	0	0	0	0	0	0	0	0	71	34	0	0	0	0	0	0	0	0	0	0	0	0	0	0	0	0	0	133	0	0	0	0	0	0	0	0	0	0	0	0	0	0	0
MO219_2	Missouri	Rhus spp.	36388	0	0	0	0	0	0	0	0	53	0	68	602	488	0	0	0	0	0	0	0	0	0	9	0	0	0	0	0	94	0	1955	0	0	0	0	0	102	0	51	0	0	0	0	0	0	0
MO219_3	Missouri	Rhus spp.	26717	0	0	0	0	0	0	0	0	0	0	847	220	159	0	0	0	0	0	0	0	0	0	37	0	0	0	0	0	0	0	1163	0	0	0	0	0	76	0	41	0	0	0	0	0	0	0
MO220_3	Missouri	Rhus spp.	48676	0	78	0	0	0	0	0	0	19	0	0	30	0	0	0	0	0	0	0	0	0	0	0	0	0	0	0	0	0	0	48	0	0	0	0	0	32773	0	15537	0	0	0	0	0	0	0
MO220_4	Missouri	Rhus spp.	43285	0	64	0	0	0	0	0	0	0	0	0	37	0	0	0	0	0	0	0	0	0	0	0	0	0	0	0	0	0	0	1625	0	0	0	0	0	27915	0	12288	0	0	0	0	0	0	0
MO220_5	Missouri	Rhus spp.	49017	0	0	0	0	0	0	0	0	0	0	0	0	0	0	0	0	0	0	0	0	0	0	0	0	0	0	0	0	0	0	38295	0	0	0	0	0	7172	0	3427	0	0	0	0	0	0	0
MO220_6	Missouri	Rhus spp.	22404	0	0	0	0	0	0	0	0	0	0	0	0	0	0	0	0	0	0	0	0	0	0	0	0	0	0	0	0	0	0	17673	0	0	0	0	0	3255	0	1290	0	0	0	0	0	0	0
MO229_5	Missouri	Rhus spp.	47001	0	0	0	0	0	0	0	0	0	0	0	213	181	0	0	0	0	25	0	0	0	0	0	0	0	0	0	0	0	0	33127	0	0	0	0	0	0	0	0	0	0	0	0	0	0	0
MO229_6	Missouri	Rhus spp.	42072	0	0	0	0	0	0	0	0	0	0	0	73	32	0	0	0	0	0	0	0	0	0	0	0	0	0	0	0	0	0	41621	0	0	0	0	0	0	0	0	0	0	29	0	0	0	0
MO229_12	Missouri	Rhus spp.	43777	0	0	0	0	0	0	0	0	0	0	0	834	645	0	0	0	0	0	0	0	0	0	0	0	0	0	0	0	0	0	38907	0	0	0	0	0	0	0	0	0	0	0	0	0	0	0
MO229_14	Missouri	Rhus spp.	22232	0	0	0	0	0	0	0	0	0	0	0	549	445	0	0	0	0	0	0	0	0	0	0	0	0	0	0	0	0	0	18677	0	0	0	0	0	0	0	0	0	0	0	0	0	0	0
MO229_15	Missouri	Rhus spp.	32276	0	0	0	0	0	0	0	0	0	0	0	1810	1291	0	0	0	0	0	0	0	0	0	0	0	0	0	0	0	0	0	23473	0	0	0	0	0	0	0	0	0	0	0	0	0	0	0
MO334_17	Missouri	Rhus spp.	3791	0	0	0	0	0	0	0	0	0	0	254	306	161	0	0	0	0	0	0	0	0	0	51	0	0	0	0	0	0	0	1113	0	0	0	0	0	0	0	0	0	0	0	0	0	0	0
MO334_18	Missouri	Rhus spp.	7353	0	0	0	0	0	0	0	0	0	0	260	930	791	0	0	0	0	0	0	0	0	0	23	0	0	0	0	0	0	0	1627	0	0	0	0	0	0	0	0	0	0	0	0	0	0	0
MO334_19	Missouri	Rhus spp.	11652	0	0	0	0	0	0	0	0	0	0	644	1225	813	0	0	0	0	0	0	0	0	0	59	0	0	0	0	0	0	0	2915	0	0	0	0	0	0	0	0	0	0	0	0	0	0	0
Total				33	283	226	43	39	308	295	7095	257	3153	3212	139360	105705	15	70	223	36	390	2482	4974	51	92	790	73938	4524	110	45	70267	215	64	423832	6576	343	95	3130	38	232589	145	105014	20	155	2225	3442	41	317	5663
[truncated: 50 more columns]

## Sheet: S2. 16S_percent_Sodalis
			Genera ->	Terriglobus	Kineococcus	Curtobacterium	Microbacterium	Mycetocola	Salinibacterium	Rothia	Couchioplanes	Mycobacterium	Friedmanniella	Propionibacterium	Actinomycetospora	Fimbriimonas	Dyadobacter	Hymenobacter	Spirosoma	Wautersiella	Pedobacter	Sphingobacterium	Bacillus	Aneurinibacillus	Paenibacillus	Enterococcus	Lactobacillus	Fructobacillus	Leuconostoc	Lactococcus	Streptococcus	Beijerinckia	Balneimonas	Bosea	Devosia	Methylopila	Methylosinus	Agrobacterium	Rhizobium	Gluconobacter	Roseomonas	Wolbachia	Kaistobacter	Novosphingobium	Sphingomonas	Achromobacter	Burkholderia	Methylibium	Ramlibacter
			Full classification ->	k__Bacteria;p__Acidobacteria;c__Acidobacteriia;o__Acidobacteriales;f__Acidobacteriaceae;g__Terriglobus	k__Bacteria;p__Actinobacteria;c__Actinobacteria;o__Actinomycetales;f__Kineosporiaceae;g__Kineococcus	k__Bacteria;p__Actinobacteria;c__Actinobacteria;o__Actinomycetales;f__Microbacteriaceae;g__Curtobacterium	k__Bacteria;p__Actinobacteria;c__Actinobacteria;o__Actinomycetales;f__Microbacteriaceae;g__Microbacterium	k__Bacteria;p__Actinobacteria;c__Actinobacteria;o__Actinomycetales;f__Microbacteriaceae;g__Mycetocola	k__Bacteria;p__Actinobacteria;c__Actinobacteria;o__Actinomycetales;f__Microbacteriaceae;g__Salinibacterium	k__Bacteria;p__Actinobacteria;c__Actinobacteria;o__Actinomycetales;f__Micrococcaceae;g__Rothia	k__Bacteria;p__Actinobacteria;c__Actinobacteria;o__Actinomycetales;f__Micromonosporaceae;g__Couchioplanes	k__Bacteria;p__Actinobacteria;c__Actinobacteria;o__Actinomycetales;f__Mycobacteriaceae;g__Mycobacterium	k__Bacteria;p__Actinobacteria;c__Actinobacteria;o__Actinomycetales;f__Nocardioidaceae;g__Friedmanniella	k__Bacteria;p__Actinobacteria;c__Actinobacteria;o__Actinomycetales;f__Propionibacteriaceae;g__Propionibacterium	k__Bacteria;p__Actinobacteria;c__Actinobacteria;o__Actinomycetales;f__Pseudonocardiaceae;g__Actinomycetospora	k__Bacteria;p__Armatimonadetes;c__[Fimbriimonadia];o__[Fimbriimonadales];f__[Fimbriimonadaceae];g__Fimbriimonas	k__Bacteria;p__Bacteroidetes;c__Cytophagia;o__Cytophagales;f__Cytophagaceae;g__Dyadobacter	k__Bacteria;p__Bacteroidetes;c__Cytophagia;o__Cytophagales;f__Cytophagaceae;g__Hymenobacter	k__Bacteria;p__Bacteroidetes;c__Cytophagia;o__Cytophagales;f__Cytophagaceae;g__Spirosoma	k__Bacteria;p__Bacteroidetes;c__Flavobacteriia;o__Flavobacteriales;f__[Weeksellaceae];g__Wautersiella	k__Bacteria;p__Bacteroidetes;c__Sphingobacteriia;o__Sphingobacteriales;f__Sphingobacteriaceae;g__Pedobacter	k__Bacteria;p__Bacteroidetes;c__Sphingobacteriia;o__Sphingobacteriales;f__Sphingobacteriaceae;g__Sphingobacterium	k__Bacteria;p__Firmicutes;c__Bacilli;o__Bacillales;f__Bacillaceae;g__Bacillus	k__Bacteria;p__Firmicutes;c__Bacilli;o__Bacillales;f__Paenibacillaceae;g__Aneurinibacillus	k__Bacteria;p__Firmicutes;c__Bacilli;o__Bacillales;f__Paenibacillaceae;g__Paenibacillus	k__Bacteria;p__Firmicutes;c__Bacilli;o__Lactobacillales;f__Enterococcaceae;g__Enterococcus	k__Bacteria;p__Firmicutes;c__Bacilli;o__Lactobacillales;f__Lactobacillaceae;g__Lactobacillus	k__Bacteria;p__Firmicutes;c__Bacilli;o__Lactobacillales;f__Leuconostocaceae;g__Fructobacillus	k__Bacteria;p__Firmicutes;c__Bacilli;o__Lactobacillales;f__Leuconostocaceae;g__Leuconostoc	k__Bacteria;p__Firmicutes;c__Bacilli;o__Lactobacillales;f__Streptococcaceae;g__Lactococcus	k__Bacteria;p__Firmicutes;c__Bacilli;o__Lactobacillales;f__Streptococcaceae;g__Streptococcus	k__Bacteria;p__Proteobacteria;c__Alphaproteobacteria;o__Rhizobiales;f__Beijerinckiaceae;g__Beijerinckia	k__Bacteria;p__Proteobacteria;c__Alphaproteobacteria;o__Rhizobiales;f__Bradyrhizobiaceae;g__Balneimonas	k__Bacteria;p__Proteobacteria;c__Alphaproteobacteria;o__Rhizobiales;f__Bradyrhizobiaceae;g__Bosea	k__Bacteria;p__Proteobacteria;c__Alphaproteobacteria;o__Rhizobiales;f__Hyphomicrobiaceae;g__Devosia	k__Bacteria;p__Proteobacteria;c__Alphaproteobacteria;o__Rhizobiales;f__Methylocystaceae;g__Methylopila	k__Bacteria;p__Proteobacteria;c__Alphaproteobacteria;o__Rhizobiales;f__Methylocystaceae;g__Methylosinus	k__Bacteria;p__Proteobacteria;c__Alphaproteobacteria;o__Rhizobiales;f__Rhizobiaceae;g__Agrobacterium	k__Bacteria;p__Proteobacteria;c__Alphaproteobacteria;o__Rhizobiales;f__Rhizobiaceae;g__Rhizobium	k__Bacteria;p__Proteobacteria;c__Alphaproteobacteria;o__Rhodospirillales;f__Acetobacteraceae;g__Gluconobacter	k__Bacteria;p__Proteobacteria;c__Alphaproteobacteria;o__Rhodospirillales;f__Acetobacteraceae;g__Roseomonas	k__Bacteria;p__Proteobacteria;c__Alphaproteobacteria;o__Rickettsiales;f__Rickettsiaceae;g__Wolbachia	k__Bacteria;p__Proteobacteria;c__Alphaproteobacteria;o__Sphingomonadales;f__Sphingomonadaceae;g__Kaistobacter	k__Bacteria;p__Proteobacteria;c__Alphaproteobacteria;o__Sphingomonadales;f__Sphingomonadaceae;g__Novosphingobium	k__Bacteria;p__Proteobacteria;c__Alphaproteobacteria;o__Sphingomonadales;f__Sphingomonadaceae;g__Sphingomonas	k__Bacteria;p__Proteobacteria;c__Betaproteobacteria;o__Burkholderiales;f__Alcaligenaceae;g__Achromobacter	k__Bacteria;p__Proteobacteria;c__Betaproteobacteria;o__Burkholderiales;f__Burkholderiaceae;g__Burkholderia	k__Bacteria;p__Proteobacteria;c__Betaproteobacteria;o__Burkholderiales;f__Comamonadaceae;g__Methylibium	k__Bacteria;p__Proteobacteria;c__Betaproteobacteria;o__Burkholderiales;f__Comamonadaceae;g__Ramlibacter
Nest_Cell	State	Nesting Substrate	Total Reads	69	43	1504	69	185	81	37	61	22	171	433	613	306	80	1439	379	3310	360	19	1877	79	28	102	58789	74	195	330	48	53	17	226	51	75	187	235	166	19	152	58618	31	418	2818	672	554	293	31
MO161_5	Missouri	Sumac	3353	0	0	0	0	0	0	0	0	0	0	0	0	0	0	0	0	0	0	0	39	0	0	0	128	0	0	0	0	0	0	0	0	0	0	0	0	0	0	2034	0	0	20	71	0	0	0
MO161_6	Missouri	Sumac	12636	0	0	0	0	0	18	0	0	0	0	0	0	0	0	23	0	0	85	0	0	0	0	0	0	0	0	0	0	0	0	20	0	0	0	69	23	0	0	337	0	36	7	0	0	0	0
G16010_6	Georgia	Raspberry	8627	0	0	0	0	0	0	0	0	0	0	0	0	0	0	20	0	0	0	0	0	0	0	0	11	0	0	0	0	0	0	0	0	0	0	0	0	0	0	0	0	0	132	51	0	0	0
G16010_7	Georgia	Raspberry	12921	0	0	0	0	0	0	0	0	0	0	3	0	0	0	0	0	0	0	0	0	0	0	0	0	0	0	0	0	0	0	0	0	0	0	0	0	0	0	12814	0	0	0	45	0	0	0
G16010_10	Georgia	Raspberry	23	0	0	0	0	0	0	0	0	0	0	0	0	0	0	0	0	0	0	0	0	0	0	0	0	0	0	0	0	0	0	0	0	0	0	0	0	0	0	0	0	0	0	0	0	0	0
G16010_11	Georgia	Raspberry	7102	0	0	0	0	0	0	0	0	0	0	0	0	0	0	0	0	34	0	0	0	0	0	0	1934	0	0	0	0	0	0	0	0	9	0	0	0	0	0	0	0	0	0	0	0	0	0
G16013_3	Georgia	Raspberry	11521	0	0	0	0	0	0	0	0	0	21	19	7	0	0	0	0	11	0	10	1534	0	0	0	0	0	160	0	0	0	0	0	0	0	49	0	0	0	0	24	0	0	0	15	0	35	0
G16013_5	Georgia	Raspberry	3105	0	0	30	0	0	0	0	0	0	0	0	18	0	0	88	0	0	12	0	0	0	0	0	389	63	0	0	0	0	0	0	0	0	0	12	0	5	0	0	17	0	186	0	137	20	0
G16013_13	Georgia	Raspberry	1124	0	0	27	0	0	0	0	0	0	0	0	0	0	0	0	0	136	0	0	0	0	0	0	644	11	0	0	0	0	0	0	0	0	0	0	0	0	0	0	0	0	0	0	0	0	0
G16013_14	Georgia	Raspberry	1334	0	0	0	0	0	0	0	0	0	0	0	34	0	0	0	0	251	0	0	0	0	20	0	245	0	0	0	0	0	0	0	0	0	0	0	0	0	0	0	0	0	12	0	0	0	0
G16013_17	Georgia	Raspberry	25317	0	0	0	0	0	0	0	0	0	0	0	0	0	0	10	0	0	0	0	0	0	0	0	25294	0	0	0	0	0	0	0	0	0	0	0	0	0	0	0	0	0	0	0	0	0	0
G16013_18	Georgia	Raspberry	89	0	0	0	0	0	0	0	0	0	0	0	0	0	0	0	0	0	0	0	0	0	0	0	0	0	0	0	0	0	0	9	0	0	0	0	0	0	0	0	0	0	16	0	0	0	0
G16033_6	Georgia	Raspberry	2241	0	13	0	0	0	0	0	0	0	0	0	0	0	0	59	0	0	0	0	0	0	0	0	1094	0	0	0	0	0	0	0	0	0	0	0	0	0	0	0	0	0	0	0	0	0	0
G16089_10	Georgia	Raspberry	2689	0	0	0	0	0	0	0	0	0	0	0	0	0	0	89	0	30	0	0	0	0	0	0	11	0	0	0	0	0	0	0	0	0	0	0	0	0	0	359	0	0	107	27	0	0	0
G16126_9	Georgia	Raspberry	3455	0	0	0	0	0	0	0	0	0	0	0	0	0	0	0	0	0	0	0	0	0	0	0	981	0	0	0	0	4	0	0	0	0	0	0	0	0	0	0	0	0	0	0	0	0	0
G16127_8	Georgia	Raspberry	3853	0	0	40	0	122	17	0	0	0	0	0	0	0	0	0	0	791	0	0	0	0	0	0	1672	0	0	48	0	0	0	0	0	0	0	0	0	0	0	35	0	0	0	0	0	0	0
G16127_11	Georgia	Raspberry	13264	0	0	78	0	25	0	0	0	0	0	11	0	0	0	0	0	261	0	0	0	0	0	70	12133	0	0	0	0	0	0	72	0	0	0	0	0	0	0	0	0	0	221	0	0	0	0
G16153_3	Georgia	Raspberry	3789	0	0	0	0	0	0	0	0	0	0	0	0	0	0	17	17	22	0	0	0	0	0	0	0	0	0	0	0	0	0	0	28	0	0	0	0	0	0	822	0	0	0	0	0	0	0
G16180_6	Georgia	Raspberry	1732	0	0	0	0	15	0	0	17	0	0	0	220	47	0	31	0	350	0	0	0	0	0	0	112	0	0	126	0	0	0	0	23	0	16	0	0	0	57	189	0	0	85	5	0	8	0
G16220_7	Georgia	Raspberry	4246	0	0	0	0	6	0	0	0	0	0	27	0	0	0	0	28	319	0	0	0	0	0	0	3307	0	0	0	0	49	0	0	0	0	0	0	0	0	0	0	0	0	100	0	0	0	0
G16310_2	Georgia	Raspberry	5785	0	0	0	0	0	0	0	0	0	0	0	0	0	0	0	0	0	0	0	0	0	0	0	0	0	0	0	0	0	0	17	0	0	0	12	0	0	0	0	0	10	0	0	0	0	0
G16004_1	Georgia	Sumac	781	0	0	0	30	0	0	0	0	0	0	0	24	0	0	58	0	0	0	0	0	0	0	0	23	0	0	0	0	0	0	0	0	0	0	0	0	0	0	34	0	0	34	0	0	0	0
G16004_2	Georgia	Sumac	5629	0	0	71	0	0	0	0	0	0	0	0	0	0	0	0	0	174	0	0	0	0	0	0	3598	0	0	0	0	0	0	0	0	0	0	0	0	0	0	0	0	28	35	0	0	0	0
G16004_3	Georgia	Sumac	734	0	0	0	0	0	0	0	0	0	0	7	0	0	0	0	0	182	0	0	0	0	0	0	346	0	0	57	0	0	0	0	0	0	0	0	0	0	0	0	0	0	0	0	0	0	0
G16004_4	Georgia	Sumac	1572	0	0	0	0	0	0	0	0	0	0	0	0	0	0	0	0	0	0	0	0	0	0	0	0	0	0	0	0	0	0	0	0	0	48	0	0	0	0	0	0	0	0	0	0	0	0
G16036_2	Georgia	Sumac	2950	0	0	0	0	0	0	0	0	0	0	0	0	0	0	6	0	0	0	0	0	0	0	0	59	0	0	0	0	0	0	0	0	0	0	0	0	0	0	1332	0	0	21	0	0	0	0
G16036_3	Georgia	Sumac	6128	0	0	146	0	0	0	0	0	4	19	0	0	0	12	0	110	141	0	0	0	0	0	0	3594	0	0	62	0	0	0	0	0	0	0	0	0	0	19	0	0	0	0	0	0	0	0
G16036_6	Georgia	Sumac	408	0	0	0	0	0	0	0	0	0	0	0	0	0	0	20	0	0	0	0	0	0	0	0	255	0	0	0	0	0	0	0	0	0	0	0	0	0	76	0	0	0	57	0	0	0	0
G16036_7	Georgia	Sumac	4009	56	0	22	0	0	29	0	0	0	0	0	25	0	0	0	0	0	0	0	0	0	0	0	207	0	0	0	0	0	0	34	0	0	0	11	0	0	0	0	0	15	24	0	0	93	0
G16038_5	Georgia	Sumac	4285	0	0	42	0	0	0	0	0	0	0	23	0	0	0	84	0	0	0	0	0	0	0	0	34	0	0	0	0	0	0	0	0	0	0	0	0	0	0	1152	0	0	0	0	14	0	0
G16038_6	Georgia	Sumac	7130	0	0	23	0	0	0	0	0	0	0	0	0	0	0	0	0	69	0	0	0	0	0	0	407	0	35	27	0	0	0	0	0	0	0	0	0	0	0	0	0	0	0	0	0	0	0
G16038_7	Georgia	Sumac	19	0	0	0	0	0	0	0	0	0	0	0	0	0	0	0	0	0	0	0	0	0	0	0	19	0	0	0	0	0	0	0	0	0	0	0	0	0	0	0	0	0	0	0	0	0	0
G16038_8	Georgia	Sumac	5875	13	0	0	0	0	17	0	0	0	0	0	28	28	0	0	0	0	0	0	0	0	0	0	166	0	0	0	0	0	0	0	0	66	26	4	0	0	0	0	0	17	63	0	25	45	0
G16039_9	Georgia	Sumac	2079	0	0	17	0	0	0	0	0	0	0	0	0	0	0	0	0	0	0	9	0	0	0	0	12	0	0	0	0	0	0	0	0	0	0	0	0	0	0	0	0	9	36	0	0	0	0
G16050_7	Georgia	Sumac	1941	0	0	190	0	0	0	0	0	0	86	0	0	113	58	538	155	0	0	0	0	0	0	0	141	0	0	0	0	0	0	0	0	0	0	6	48	0	0	0	0	53	450	0	0	31	0
G16051_1	Georgia	Sumac	23290	0	0	0	0	0	0	0	0	0	0	0	0	0	0	0	0	0	0	0	0	0	0	0	113	0	0	0	0	0	0	0	0	0	0	0	0	0	0	0	0	0	11	0	36	0	0
MO161_15	Missouri	Sumac	61	0	0	0	0	0	0	13	0	0	0	0	0	0	0	0	0	0	0	0	0	0	0	0	0	0	0	0	0	0	0	0	0	0	0	0	0	0	0	48	0	0	0	0	0	0	0
MO148_2	Missouri	Sumac	18	0	0	0	0	0	0	0	0	0	0	0	0	0	0	0	0	0	0	0	0	0	0	0	18	0	0	0	0	0	0	0	0	0	0	0	0	0	0	0	0	0	0	0	0	0	0
F101_2	New_Hampshire	Sumac	30	0	0	30	0	0	0	0	0	0	0	0	0	0	0	0	0	0	0	0	0	0	0	0	0	0	0	0	0	0	0	0	0	0	0	0	0	0	0	0	0	0	0	0	0	0	0
MO179_10	Missouri	Sumac	14217	0	19	0	0	0	0	0	0	0	0	0	0	0	0	0	0	0	0	0	0	0	0	0	0	0	0	0	0	0	0	0	0	0	0	0	0	0	0	4478	0	0	0	10	0	0	15
MO189_2	Missouri	Sumac	996	0	0	0	0	0	0	0	0	0	0	0	0	0	0	0	0	0	0	0	0	0	0	0	0	0	0	0	0	0	0	0	0	0	0	0	0	0	0	664	0	0	33	0	0	0	0
MO197_8	Missouri	Sumac	14128	0	11	0	0	0	0	0	0	0	0	19	0	0	0	0	0	0	0	0	0	0	0	0	0	0	0	0	0	0	0	0	0	0	0	0	0	0	0	7497	0	0	0	14	0	0	0
MO197_16	Missouri	Sumac	3702	0	0	0	0	0	0	0	0	0	0	0	0	0	0	0	0	0	0	0	0	0	0	0	0	0	0	0	0	0	0	0	0	0	0	0	0	0	0	3013	0	0	0	0	0	0	0
MO205_4	Missouri	Sumac	34055	0	0	0	0	0	0	0	0	0	0	0	0	0	0	0	0	0	0	0	0	0	0	0	0	0	0	0	0	0	0	0	0	0	0	0	0	0	0	3008	0	0	0	0	0	0	0
MO205_6	Missouri	Sumac	1540	0	0	0	0	0	0	0	0	0	0	149	0	0	0	16	0	261	187	0	0	0	0	32	0	0	0	0	0	0	0	0	0	0	0	53	0	0	0	0	0	109	0	41	0	0	0
MO205_9	Missouri	Sumac	7322	0	0	0	0	17	0	0	0	0	0	16	0	0	0	0	13	173	0	0	0	0	0	0	370	0	0	10	0	0	0	0	0	0	0	0	0	0	0	7	0	0	0	0	0	0	0
MO205_10	Missouri	Sumac	3058	0	0	0	0	0	0	0	0	0	0	0	8	14	0	0	0	33	0	0	0	0	0	0	0	0	0	0	0	0	0	0	0	0	0	0	0	0	0	2025	0	0	0	0	0	0	0
MO205_11	Missouri	Sumac	236	0	0	0	0	0	0	0	0	0	0	0	0	0	0	8	0	0	0	0	0	0	0	0	48	0	0	0	0	0	0	0	0	0	0	0	0	0	0	0	0	0	118	0	27	0	0
MO205_12	Missouri	Sumac	4318	0	0	17	0	0	0	0	0	0	0	0	0	0	0	0	0	0	0	0	0	0	8	0	0	0	0	0	0	0	0	0	0	0	0	0	0	0	0	0	0	0	8	22	0	0	0
MO218_6	Missouri	Sumac	9928	0	0	0	0	0	0	0	0	0	45	0	17	6	0	81	0	0	0	0	0	0	0	0	0	0	0	0	0	0	0	0	0	0	11	0	0	0	0	9425	0	0	13	72	0	32	0
MO218_10	Missouri	Sumac	7505	0	0	55	0	0	0	0	0	0	0	0	0	0	0	0	0	0	0	0	0	0	0	0	0	0	0	0	0	0	7	0	0	0	0	0	0	0	0	0	0	0	19	0	0	0	0
MO219_2	Missouri	Sumac	2954	0	0	0	0	0	0	0	0	0	0	0	48	0	0	0	0	43	0	0	0	0	0	0	0	0	0	0	0	0	0	0	0	0	0	0	0	0	0	2863	0	0	0	0	0	0	0
MO219_3	Missouri	Sumac	1929	0	0	0	7	0	0	0	0	0	0	66	0	0	10	0	13	29	6	0	0	0	0	0	1108	0	0	0	0	0	0	0	0	0	0	0	0	0	0	0	0	0	0	43	11	0	0
MO220_3	Missouri	Sumac	10626	0	0	0	0	0	0	0	0	0	0	0	0	0	0	0	0	0	0	0	0	0	0	0	0	0	0	0	0	0	0	0	0	0	0	0	0	0	0	14	0	0	0	0	0	0	0
MO220_4	Missouri	Sumac	381	0	0	0	0	0	0	0	0	0	0	0	0	0	0	0	0	0	0	0	158	0	0	0	0	0	0	0	0	0	0	0	0	0	0	0	0	14	0	0	0	0	39	0	85	0	0
MO220_5	Missouri	Sumac	1889	0	0	95	0	0	0	0	0	0	0	26	140	0	0	18	0	0	0	0	0	0	0	0	0	0	0	0	0	0	0	60	0	0	0	15	0	0	0	0	0	10	110	64	134	0	0
MO229_5	Missouri	Sumac	865	0	0	30	0	0	0	0	0	0	0	0	0	0	0	33	0	0	56	0	0	0	0	0	21	0	0	0	0	0	0	0	0	0	0	53	33	0	0	87	14	0	169	78	0	0	0
MO229_6	Missouri	Sumac	4505	0	0	97	32	0	0	0	44	18	0	36	24	23	0	81	43	0	0	0	0	25	0	0	0	0	0	0	0	0	10	0	0	0	7	0	0	0	0	120	0	0	290	57	0	15	0
MO229_14	Missouri	Sumac	139	0	0	0	0	0	0	0	0	0	0	0	0	0	0	0	0	0	0	0	0	0	0	0	21	0	0	0	0	0	0	0	0	0	0	0	0	0	0	0	0	0	0	0	0	0	0
MO229_15	Missouri	Sumac	1139	0	0	0	0	0	0	0	0	0	0	0	0	0	0	0	0	0	0	0	32	0	0	0	0	0	0	0	0	0	0	0	0	0	6	0	0	0	0	851	0	0	0	0	0	0	0
MO334_17	Missouri	Sumac	747	0	0	0	0	0	0	0	0	0	0	0	0	0	0	0	0	0	0	0	0	0	0	0	0	0	0	0	0	0	0	0	0	0	24	0	0	0	0	0	0	0	0	0	21	0	16
F58_1	New_Hampshire	Sumac	501	0	0	0	0	0	0	0	0	0	0	18	0	0	0	49	0	0	0	0	34	30	0	0	49	0	0	0	0	0	0	14	0	0	0	0	21	0	0	0	0	0	184	27	20	0	0
F58_2	New_Hampshire	Sumac	82	0	0	0	0	0	0	0	0	0	0	0	0	0	0	0	0	0	0	0	44	0	0	0	0	0	0	0	0	0	0	0	0	0	0	0	0	0	0	0	0	0	0	0	0	0	0
F58_5	New_Hampshire	Sumac	6079	0	0	0	0	0	0	0	0	0	0	13	0	0	0	0	0	0	0	0	0	0	0	0	0	0	0	0	0	0	0	0	0	0	0	0	0	0	0	2928	0	0	0	5	0	0	0
MO160_9	Missouri	Sumac	1457.92	0	0	0	0	0	0	0	0	0	0	0	0	0	0	0	0	0	0	0	36	0	0	0	0	0	0	0	0	0	0	0	0	0	0	0	0	0	0	0	0	0	0	0	0	0	0
F60_2	New_Hampshire	Raspberry	3457	0	0	77	0	0	0	0	0	0	0	0	0	0	0	0	0	0	0	0	0	0	0	0	0	0	0	0	0	0	0	0	0	0	0	0	16	0	0	0	0	0	44	0	0	0	0
F60_3	New_Hampshire	Raspberry	1432	0	0	37	0	0	0	0	0	0	0	0	0	0	0	0	0	0	0	0	0	0	0	0	93	0	0	0	0	0	0	0	0	0	0	0	0	0	0	1157	0	47	0	0	0	0	0
F60_5	New_Hampshire	Raspberry	295	0	0	19	0	0	0	0	0	0	0	0	0	0	0	8	0	0	0	0	0	0	0	0	132	0	0	0	14	0	0	0	0	0	0	0	0	0	0	0	0	0	0	0	0	0	0
F61_1	New_Hampshire	Raspberry	463	0	0	0	0	0	0	24	0	0	0	0	20	0	0	102	0	0	14	0	0	0	0	0	0	0	0	0	34	0	0	0	0	0	0	0	25	0	0	0	0	84	17	0	0	14	0
F61_2	New_Hampshire	Raspberry	167	0	0	23	0	0	0	0	0	0	0	0	0	0	0	0	0	0	0	0	0	24	0	0	0	0	0	0	0	0	0	0	0	0	0	0	0	0	0	0	0	0	40	0	0	0	0
MO161_3	Missouri	Sumac	599	0	0	338	0	0	0	0	0	0	0	0	0	75	0	0	0	0	0	0	0	0	0	0	0	0	0	0	0	0	0	0	0	0	0	0	0	0	0	0	0	0	117	25	44	0	0
MO161_4	Missouri	Sumac	14614	0	0	0	0	0	0	0	0	0	0	0	0	0	0	0	0	0	0	0	0	0	0	0	0	0	0	0	0	0	0	0	0	0	0	0	0	0	0	1301	0	0	0	0	0	0	0
[truncated: 12 more columns]

## Sheet: S3. 16S_no_Sodalis
			Genera ->	Terriglobus	Kineococcus	Curtobacterium	Microbacterium	Mycetocola	Salinibacterium	Rothia	Couchioplanes	Mycobacterium	Friedmanniella	Propionibacterium	Actinomycetospora	Fimbriimonas	Dyadobacter	Hymenobacter	Spirosoma	Wautersiella	Pedobacter	Sphingobacterium	Bacillus	Aneurinibacillus	Paenibacillus	Enterococcus	Lactobacillus	Fructobacillus	Leuconostoc	Lactococcus	Streptococcus	Beijerinckia	Balneimonas	Bosea	Devosia	Methylopila	Methylosinus	Agrobacterium	Rhizobium	Gluconobacter	Roseomonas	Wolbachia	Kaistobacter	Novosphingobium	Sphingomonas	Achromobacter	Burkholderia	Methylibium	Ramlibacter
			Full classification ->	k__Bacteria;p__Acidobacteria;c__Acidobacteriia;o__Acidobacteriales;f__Acidobacteriaceae;g__Terriglobus	k__Bacteria;p__Actinobacteria;c__Actinobacteria;o__Actinomycetales;f__Kineosporiaceae;g__Kineococcus	k__Bacteria;p__Actinobacteria;c__Actinobacteria;o__Actinomycetales;f__Microbacteriaceae;g__Curtobacterium	k__Bacteria;p__Actinobacteria;c__Actinobacteria;o__Actinomycetales;f__Microbacteriaceae;g__Microbacterium	k__Bacteria;p__Actinobacteria;c__Actinobacteria;o__Actinomycetales;f__Microbacteriaceae;g__Mycetocola	k__Bacteria;p__Actinobacteria;c__Actinobacteria;o__Actinomycetales;f__Microbacteriaceae;g__Salinibacterium	k__Bacteria;p__Actinobacteria;c__Actinobacteria;o__Actinomycetales;f__Micrococcaceae;g__Rothia	k__Bacteria;p__Actinobacteria;c__Actinobacteria;o__Actinomycetales;f__Micromonosporaceae;g__Couchioplanes	k__Bacteria;p__Actinobacteria;c__Actinobacteria;o__Actinomycetales;f__Mycobacteriaceae;g__Mycobacterium	k__Bacteria;p__Actinobacteria;c__Actinobacteria;o__Actinomycetales;f__Nocardioidaceae;g__Friedmanniella	k__Bacteria;p__Actinobacteria;c__Actinobacteria;o__Actinomycetales;f__Propionibacteriaceae;g__Propionibacterium	k__Bacteria;p__Actinobacteria;c__Actinobacteria;o__Actinomycetales;f__Pseudonocardiaceae;g__Actinomycetospora	k__Bacteria;p__Armatimonadetes;c__[Fimbriimonadia];o__[Fimbriimonadales];f__[Fimbriimonadaceae];g__Fimbriimonas	k__Bacteria;p__Bacteroidetes;c__Cytophagia;o__Cytophagales;f__Cytophagaceae;g__Dyadobacter	k__Bacteria;p__Bacteroidetes;c__Cytophagia;o__Cytophagales;f__Cytophagaceae;g__Hymenobacter	k__Bacteria;p__Bacteroidetes;c__Cytophagia;o__Cytophagales;f__Cytophagaceae;g__Spirosoma	k__Bacteria;p__Bacteroidetes;c__Flavobacteriia;o__Flavobacteriales;f__[Weeksellaceae];g__Wautersiella	k__Bacteria;p__Bacteroidetes;c__Sphingobacteriia;o__Sphingobacteriales;f__Sphingobacteriaceae;g__Pedobacter	k__Bacteria;p__Bacteroidetes;c__Sphingobacteriia;o__Sphingobacteriales;f__Sphingobacteriaceae;g__Sphingobacterium	k__Bacteria;p__Firmicutes;c__Bacilli;o__Bacillales;f__Bacillaceae;g__Bacillus	k__Bacteria;p__Firmicutes;c__Bacilli;o__Bacillales;f__Paenibacillaceae;g__Aneurinibacillus	k__Bacteria;p__Firmicutes;c__Bacilli;o__Bacillales;f__Paenibacillaceae;g__Paenibacillus	k__Bacteria;p__Firmicutes;c__Bacilli;o__Lactobacillales;f__Enterococcaceae;g__Enterococcus	k__Bacteria;p__Firmicutes;c__Bacilli;o__Lactobacillales;f__Lactobacillaceae;g__Lactobacillus	k__Bacteria;p__Firmicutes;c__Bacilli;o__Lactobacillales;f__Leuconostocaceae;g__Fructobacillus	k__Bacteria;p__Firmicutes;c__Bacilli;o__Lactobacillales;f__Leuconostocaceae;g__Leuconostoc	k__Bacteria;p__Firmicutes;c__Bacilli;o__Lactobacillales;f__Streptococcaceae;g__Lactococcus	k__Bacteria;p__Firmicutes;c__Bacilli;o__Lactobacillales;f__Streptococcaceae;g__Streptococcus	k__Bacteria;p__Proteobacteria;c__Alphaproteobacteria;o__Rhizobiales;f__Beijerinckiaceae;g__Beijerinckia	k__Bacteria;p__Proteobacteria;c__Alphaproteobacteria;o__Rhizobiales;f__Bradyrhizobiaceae;g__Balneimonas	k__Bacteria;p__Proteobacteria;c__Alphaproteobacteria;o__Rhizobiales;f__Bradyrhizobiaceae;g__Bosea	k__Bacteria;p__Proteobacteria;c__Alphaproteobacteria;o__Rhizobiales;f__Hyphomicrobiaceae;g__Devosia	k__Bacteria;p__Proteobacteria;c__Alphaproteobacteria;o__Rhizobiales;f__Methylocystaceae;g__Methylopila	k__Bacteria;p__Proteobacteria;c__Alphaproteobacteria;o__Rhizobiales;f__Methylocystaceae;g__Methylosinus	k__Bacteria;p__Proteobacteria;c__Alphaproteobacteria;o__Rhizobiales;f__Rhizobiaceae;g__Agrobacterium	k__Bacteria;p__Proteobacteria;c__Alphaproteobacteria;o__Rhizobiales;f__Rhizobiaceae;g__Rhizobium	k__Bacteria;p__Proteobacteria;c__Alphaproteobacteria;o__Rhodospirillales;f__Acetobacteraceae;g__Gluconobacter	k__Bacteria;p__Proteobacteria;c__Alphaproteobacteria;o__Rhodospirillales;f__Acetobacteraceae;g__Roseomonas	k__Bacteria;p__Proteobacteria;c__Alphaproteobacteria;o__Rickettsiales;f__Rickettsiaceae;g__Wolbachia	k__Bacteria;p__Proteobacteria;c__Alphaproteobacteria;o__Sphingomonadales;f__Sphingomonadaceae;g__Kaistobacter	k__Bacteria;p__Proteobacteria;c__Alphaproteobacteria;o__Sphingomonadales;f__Sphingomonadaceae;g__Novosphingobium	k__Bacteria;p__Proteobacteria;c__Alphaproteobacteria;o__Sphingomonadales;f__Sphingomonadaceae;g__Sphingomonas	k__Bacteria;p__Proteobacteria;c__Betaproteobacteria;o__Burkholderiales;f__Alcaligenaceae;g__Achromobacter	k__Bacteria;p__Proteobacteria;c__Betaproteobacteria;o__Burkholderiales;f__Burkholderiaceae;g__Burkholderia	k__Bacteria;p__Proteobacteria;c__Betaproteobacteria;o__Burkholderiales;f__Comamonadaceae;g__Methylibium	k__Bacteria;p__Proteobacteria;c__Betaproteobacteria;o__Burkholderiales;f__Comamonadaceae;g__Ramlibacter
Nest_Cell	State	Nesting Substrate	Total Reads	69	43	1504	69	185	81	37	61	22	171	433	613	306	80	1439	379	3310	360	19	1877	79	28	102	58768	74	195	330	48	53	17	226	51	75	187	235	166	19	152	58618	31	418	2818	672	554	293	31
MO161_5	Missouri	Sumac	2430	0	0	0	0	0	0	0	0	0	0	0	0	0	0	0	0	0	0	0	39	0	0	0	128	0	0	0	0	0	0	0	0	0	0	0	0	0	0	2034	0	0	20	71	0	0	0
MO161_6	Missouri	Sumac	665	0	0	0	0	0	18	0	0	0	0	0	0	0	0	23	0	0	85	0	0	0	0	0	0	0	0	0	0	0	0	20	0	0	0	69	23	0	0	337	0	36	7	0	0	0	0
G16010_6	Georgia	Raspberry	1090	0	0	0	0	0	0	0	0	0	0	0	0	0	0	20	0	0	0	0	0	0	0	0	11	0	0	0	0	0	0	0	0	0	0	0	0	0	0	0	0	0	132	51	0	0	0
G16010_7	Georgia	Raspberry	12921	0	0	0	0	0	0	0	0	0	0	3	0	0	0	0	0	0	0	0	0	0	0	0	0	0	0	0	0	0	0	0	0	0	0	0	0	0	0	12814	0	0	0	45	0	0	0
G16010_10	Georgia	Raspberry	23	0	0	0	0	0	0	0	0	0	0	0	0	0	0	0	0	0	0	0	0	0	0	0	0	0	0	0	0	0	0	0	0	0	0	0	0	0	0	0	0	0	0	0	0	0	0
G16010_11	Georgia	Raspberry	7102	0	0	0	0	0	0	0	0	0	0	0	0	0	0	0	0	34	0	0	0	0	0	0	1934	0	0	0	0	0	0	0	0	9	0	0	0	0	0	0	0	0	0	0	0	0	0
G16013_3	Georgia	Raspberry	11521	0	0	0	0	0	0	0	0	0	21	19	7	0	0	0	0	11	0	10	1534	0	0	0	0	0	160	0	0	0	0	0	0	0	49	0	0	0	0	24	0	0	0	15	0	35	0
G16013_5	Georgia	Raspberry	3105	0	0	30	0	0	0	0	0	0	0	0	18	0	0	88	0	0	12	0	0	0	0	0	389	63	0	0	0	0	0	0	0	0	0	12	0	5	0	0	17	0	186	0	137	20	0
G16013_13	Georgia	Raspberry	1124	0	0	27	0	0	0	0	0	0	0	0	0	0	0	0	0	136	0	0	0	0	0	0	644	11	0	0	0	0	0	0	0	0	0	0	0	0	0	0	0	0	0	0	0	0	0
G16013_14	Georgia	Raspberry	1334	0	0	0	0	0	0	0	0	0	0	0	34	0	0	0	0	251	0	0	0	0	20	0	245	0	0	0	0	0	0	0	0	0	0	0	0	0	0	0	0	0	12	0	0	0	0
G16013_17	Georgia	Raspberry	25317	0	0	0	0	0	0	0	0	0	0	0	0	0	0	10	0	0	0	0	0	0	0	0	25294	0	0	0	0	0	0	0	0	0	0	0	0	0	0	0	0	0	0	0	0	0	0
G16013_18	Georgia	Raspberry	89	0	0	0	0	0	0	0	0	0	0	0	0	0	0	0	0	0	0	0	0	0	0	0	0	0	0	0	0	0	0	9	0	0	0	0	0	0	0	0	0	0	16	0	0	0	0
G16033_6	Georgia	Raspberry	2241	0	13	0	0	0	0	0	0	0	0	0	0	0	0	59	0	0	0	0	0	0	0	0	1094	0	0	0	0	0	0	0	0	0	0	0	0	0	0	0	0	0	0	0	0	0	0
G16089_10	Georgia	Raspberry	2689	0	0	0	0	0	0	0	0	0	0	0	0	0	0	89	0	30	0	0	0	0	0	0	11	0	0	0	0	0	0	0	0	0	0	0	0	0	0	359	0	0	107	27	0	0	0
G16126_9	Georgia	Raspberry	3455	0	0	0	0	0	0	0	0	0	0	0	0	0	0	0	0	0	0	0	0	0	0	0	981	0	0	0	0	4	0	0	0	0	0	0	0	0	0	0	0	0	0	0	0	0	0
G16127_8	Georgia	Raspberry	3853	0	0	40	0	122	17	0	0	0	0	0	0	0	0	0	0	791	0	0	0	0	0	0	1672	0	0	48	0	0	0	0	0	0	0	0	0	0	0	35	0	0	0	0	0	0	0
G16127_11	Georgia	Raspberry	13264	0	0	78	0	25	0	0	0	0	0	11	0	0	0	0	0	261	0	0	0	0	0	70	12133	0	0	0	0	0	0	72	0	0	0	0	0	0	0	0	0	0	221	0	0	0	0
G16153_3	Georgia	Raspberry	3208	0	0	0	0	0	0	0	0	0	0	0	0	0	0	17	17	22	0	0	0	0	0	0	0	0	0	0	0	0	0	0	28	0	0	0	0	0	0	822	0	0	0	0	0	0	0
G16180_6	Georgia	Raspberry	1732	0	0	0	0	15	0	0	17	0	0	0	220	47	0	31	0	350	0	0	0	0	0	0	112	0	0	126	0	0	0	0	23	0	16	0	0	0	57	189	0	0	85	5	0	8	0
G16220_7	Georgia	Raspberry	4246	0	0	0	0	6	0	0	0	0	0	27	0	0	0	0	28	319	0	0	0	0	0	0	3307	0	0	0	0	49	0	0	0	0	0	0	0	0	0	0	0	0	100	0	0	0	0
G16310_2	Georgia	Raspberry	3934	0	0	0	0	0	0	0	0	0	0	0	0	0	0	0	0	0	0	0	0	0	0	0	0	0	0	0	0	0	0	17	0	0	0	12	0	0	0	0	0	10	0	0	0	0	0
G16004_1	Georgia	Sumac	781	0	0	0	30	0	0	0	0	0	0	0	24	0	0	58	0	0	0	0	0	0	0	0	23	0	0	0	0	0	0	0	0	0	0	0	0	0	0	34	0	0	34	0	0	0	0
G16004_2	Georgia	Sumac	5629	0	0	71	0	0	0	0	0	0	0	0	0	0	0	0	0	174	0	0	0	0	0	0	3598	0	0	0	0	0	0	0	0	0	0	0	0	0	0	0	0	28	35	0	0	0	0
G16004_3	Georgia	Sumac	734	0	0	0	0	0	0	0	0	0	0	7	0	0	0	0	0	182	0	0	0	0	0	0	346	0	0	57	0	0	0	0	0	0	0	0	0	0	0	0	0	0	0	0	0	0	0
G16004_4	Georgia	Sumac	1572	0	0	0	0	0	0	0	0	0	0	0	0	0	0	0	0	0	0	0	0	0	0	0	0	0	0	0	0	0	0	0	0	0	48	0	0	0	0	0	0	0	0	0	0	0	0
G16036_2	Georgia	Sumac	2432	0	0	0	0	0	0	0	0	0	0	0	0	0	0	6	0	0	0	0	0	0	0	0	59	0	0	0	0	0	0	0	0	0	0	0	0	0	0	1332	0	0	21	0	0	0	0
G16036_3	Georgia	Sumac	6128	0	0	146	0	0	0	0	0	4	19	0	0	0	12	0	110	141	0	0	0	0	0	0	3594	0	0	62	0	0	0	0	0	0	0	0	0	0	19	0	0	0	0	0	0	0	0
G16036_6	Georgia	Sumac	408	0	0	0	0	0	0	0	0	0	0	0	0	0	0	20	0	0	0	0	0	0	0	0	255	0	0	0	0	0	0	0	0	0	0	0	0	0	76	0	0	0	57	0	0	0	0
G16036_7	Georgia	Sumac	4009	56	0	22	0	0	29	0	0	0	0	0	25	0	0	0	0	0	0	0	0	0	0	0	207	0	0	0	0	0	0	34	0	0	0	11	0	0	0	0	0	15	24	0	0	93	0
G16038_5	Georgia	Sumac	1820	0	0	42	0	0	0	0	0	0	0	23	0	0	0	84	0	0	0	0	0	0	0	0	34	0	0	0	0	0	0	0	0	0	0	0	0	0	0	1152	0	0	0	0	14	0	0
G16038_6	Georgia	Sumac	7130	0	0	23	0	0	0	0	0	0	0	0	0	0	0	0	0	69	0	0	0	0	0	0	407	0	35	27	0	0	0	0	0	0	0	0	0	0	0	0	0	0	0	0	0	0	0
G16038_7	Georgia	Sumac	19	0	0	0	0	0	0	0	0	0	0	0	0	0	0	0	0	0	0	0	0	0	0	0	19	0	0	0	0	0	0	0	0	0	0	0	0	0	0	0	0	0	0	0	0	0	0
G16038_8	Georgia	Sumac	5875	13	0	0	0	0	17	0	0	0	0	0	28	28	0	0	0	0	0	0	0	0	0	0	166	0	0	0	0	0	0	0	0	66	26	4	0	0	0	0	0	17	63	0	25	45	0
G16039_9	Georgia	Sumac	2079	0	0	17	0	0	0	0	0	0	0	0	0	0	0	0	0	0	0	9	0	0	0	0	12	0	0	0	0	0	0	0	0	0	0	0	0	0	0	0	0	9	36	0	0	0	0
G16050_7	Georgia	Sumac	1941	0	0	190	0	0	0	0	0	0	86	0	0	113	58	538	155	0	0	0	0	0	0	0	141	0	0	0	0	0	0	0	0	0	0	6	48	0	0	0	0	53	450	0	0	31	0
G16051_1	Georgia	Sumac	23290	0	0	0	0	0	0	0	0	0	0	0	0	0	0	0	0	0	0	0	0	0	0	0	113	0	0	0	0	0	0	0	0	0	0	0	0	0	0	0	0	0	11	0	36	0	0
MO161_15	Missouri	Sumac	61	0	0	0	0	0	0	13	0	0	0	0	0	0	0	0	0	0	0	0	0	0	0	0	0	0	0	0	0	0	0	0	0	0	0	0	0	0	0	48	0	0	0	0	0	0	0
MO148_2	Missouri	Sumac	18	0	0	0	0	0	0	0	0	0	0	0	0	0	0	0	0	0	0	0	0	0	0	0	18	0	0	0	0	0	0	0	0	0	0	0	0	0	0	0	0	0	0	0	0	0	0
F101_2	New_Hampshire	Sumac	30	0	0	30	0	0	0	0	0	0	0	0	0	0	0	0	0	0	0	0	0	0	0	0	0	0	0	0	0	0	0	0	0	0	0	0	0	0	0	0	0	0	0	0	0	0	0
MO179_10	Missouri	Sumac	4532	0	19	0	0	0	0	0	0	0	0	0	0	0	0	0	0	0	0	0	0	0	0	0	0	0	0	0	0	0	0	0	0	0	0	0	0	0	0	4478	0	0	0	10	0	0	15
MO189_2	Missouri	Sumac	996	0	0	0	0	0	0	0	0	0	0	0	0	0	0	0	0	0	0	0	0	0	0	0	0	0	0	0	0	0	0	0	0	0	0	0	0	0	0	664	0	0	33	0	0	0	0
MO197_8	Missouri	Sumac	8757	0	11	0	0	0	0	0	0	0	0	19	0	0	0	0	0	0	0	0	0	0	0	0	0	0	0	0	0	0	0	0	0	0	0	0	0	0	0	7497	0	0	0	14	0	0	0
MO197_16	Missouri	Sumac	3702	0	0	0	0	0	0	0	0	0	0	0	0	0	0	0	0	0	0	0	0	0	0	0	0	0	0	0	0	0	0	0	0	0	0	0	0	0	0	3013	0	0	0	0	0	0	0
MO205_4	Missouri	Sumac	3008	0	0	0	0	0	0	0	0	0	0	0	0	0	0	0	0	0	0	0	0	0	0	0	0	0	0	0	0	0	0	0	0	0	0	0	0	0	0	3008	0	0	0	0	0	0	0
MO205_6	Missouri	Sumac	1540	0	0	0	0	0	0	0	0	0	0	149	0	0	0	16	0	261	187	0	0	0	0	32	0	0	0	0	0	0	0	0	0	0	0	53	0	0	0	0	0	109	0	41	0	0	0
MO205_9	Missouri	Sumac	7322	0	0	0	0	17	0	0	0	0	0	16	0	0	0	0	13	173	0	0	0	0	0	0	370	0	0	10	0	0	0	0	0	0	0	0	0	0	0	7	0	0	0	0	0	0	0
MO205_10	Missouri	Sumac	3058	0	0	0	0	0	0	0	0	0	0	0	8	14	0	0	0	33	0	0	0	0	0	0	0	0	0	0	0	0	0	0	0	0	0	0	0	0	0	2025	0	0	0	0	0	0	0
MO205_11	Missouri	Sumac	236	0	0	0	0	0	0	0	0	0	0	0	0	0	0	8	0	0	0	0	0	0	0	0	48	0	0	0	0	0	0	0	0	0	0	0	0	0	0	0	0	0	118	0	27	0	0
MO205_12	Missouri	Sumac	4318	0	0	17	0	0	0	0	0	0	0	0	0	0	0	0	0	0	0	0	0	0	8	0	0	0	0	0	0	0	0	0	0	0	0	0	0	0	0	0	0	0	8	22	0	0	0
MO218_6	Missouri	Sumac	9928	0	0	0	0	0	0	0	0	0	45	0	17	6	0	81	0	0	0	0	0	0	0	0	0	0	0	0	0	0	0	0	0	0	11	0	0	0	0	9425	0	0	13	72	0	32	0
MO218_10	Missouri	Sumac	124	0	0	55	0	0	0	0	0	0	0	0	0	0	0	0	0	0	0	0	0	0	0	0	0	0	0	0	0	0	7	0	0	0	0	0	0	0	0	0	0	0	19	0	0	0	0
MO219_2	Missouri	Sumac	2954	0	0	0	0	0	0	0	0	0	0	0	48	0	0	0	0	43	0	0	0	0	0	0	0	0	0	0	0	0	0	0	0	0	0	0	0	0	0	2863	0	0	0	0	0	0	0
MO219_3	Missouri	Sumac	1929	0	0	0	7	0	0	0	0	0	0	66	0	0	10	0	13	29	6	0	0	0	0	0	1108	0	0	0	0	0	0	0	0	0	0	0	0	0	0	0	0	0	0	43	11	0	0
MO220_3	Missouri	Sumac	10626	0	0	0	0	0	0	0	0	0	0	0	0	0	0	0	0	0	0	0	0	0	0	0	0	0	0	0	0	0	0	0	0	0	0	0	0	0	0	14	0	0	0	0	0	0	0
MO220_4	Missouri	Sumac	381	0	0	0	0	0	0	0	0	0	0	0	0	0	0	0	0	0	0	0	158	0	0	0	0	0	0	0	0	0	0	0	0	0	0	0	0	14	0	0	0	0	39	0	85	0	0
MO220_5	Missouri	Sumac	1889	0	0	95	0	0	0	0	0	0	0	26	140	0	0	18	0	0	0	0	0	0	0	0	0	0	0	0	0	0	0	60	0	0	0	15	0	0	0	0	0	10	110	64	134	0	0
MO229_5	Missouri	Sumac	865	0	0	30	0	0	0	0	0	0	0	0	0	0	0	33	0	0	56	0	0	0	0	0	21	0	0	0	0	0	0	0	0	0	0	53	33	0	0	87	14	0	169	78	0	0	0
MO229_6	Missouri	Sumac	4505	0	0	97	32	0	0	0	44	18	0	36	24	23	0	81	43	0	0	0	0	25	0	0	0	0	0	0	0	0	10	0	0	0	7	0	0	0	0	120	0	0	290	57	0	15	0
MO229_15	Missouri	Sumac	1059	0	0	0	0	0	0	0	0	0	0	0	0	0	0	0	0	0	0	0	32	0	0	0	0	0	0	0	0	0	0	0	0	0	6	0	0	0	0	851	0	0	0	0	0	0	0
MO334_17	Missouri	Sumac	747	0	0	0	0	0	0	0	0	0	0	0	0	0	0	0	0	0	0	0	0	0	0	0	0	0	0	0	0	0	0	0	0	0	24	0	0	0	0	0	0	0	0	0	21	0	16
F58_1	New_Hampshire	Sumac	501	0	0	0	0	0	0	0	0	0	0	18	0	0	0	49	0	0	0	0	34	30	0	0	49	0	0	0	0	0	0	14	0	0	0	0	21	0	0	0	0	0	184	27	20	0	0
F58_2	New_Hampshire	Sumac	82	0	0	0	0	0	0	0	0	0	0	0	0	0	0	0	0	0	0	0	44	0	0	0	0	0	0	0	0	0	0	0	0	0	0	0	0	0	0	0	0	0	0	0	0	0	0
F58_5	New_Hampshire	Sumac	2959	0	0	0	0	0	0	0	0	0	0	13	0	0	0	0	0	0	0	0	0	0	0	0	0	0	0	0	0	0	0	0	0	0	0	0	0	0	0	2928	0	0	0	5	0	0	0
MO160_9	Missouri	Sumac	36	0	0	0	0	0	0	0	0	0	0	0	0	0	0	0	0	0	0	0	36	0	0	0	0	0	0	0	0	0	0	0	0	0	0	0	0	0	0	0	0	0	0	0	0	0	0
F60_2	New_Hampshire	Raspberry	1193	0	0	77	0	0	0	0	0	0	0	0	0	0	0	0	0	0	0	0	0	0	0	0	0	0	0	0	0	0	0	0	0	0	0	0	16	0	0	0	0	0	44	0	0	0	0
F60_3	New_Hampshire	Raspberry	1432	0	0	37	0	0	0	0	0	0	0	0	0	0	0	0	0	0	0	0	0	0	0	0	93	0	0	0	0	0	0	0	0	0	0	0	0	0	0	1157	0	47	0	0	0	0	0
F60_5	New_Hampshire	Raspberry	295	0	0	19	0	0	0	0	0	0	0	0	0	0	0	8	0	0	0	0	0	0	0	0	132	0	0	0	14	0	0	0	0	0	0	0	0	0	0	0	0	0	0	0	0	0	0
F61_1	New_Hampshire	Raspberry	463	0	0	0	0	0	0	24	0	0	0	0	20	0	0	102	0	0	14	0	0	0	0	0	0	0	0	0	34	0	0	0	0	0	0	0	25	0	0	0	0	84	17	0	0	14	0
F61_2	New_Hampshire	Raspberry	167	0	0	23	0	0	0	0	0	0	0	0	0	0	0	0	0	0	0	0	0	24	0	0	0	0	0	0	0	0	0	0	0	0	0	0	0	0	0	0	0	0	40	0	0	0	0
MO161_3	Missouri	Sumac	599	0	0	338	0	0	0	0	0	0	0	0	0	75	0	0	0	0	0	0	0	0	0	0	0	0	0	0	0	0	0	0	0	0	0	0	0	0	0	0	0	0	117	25	44	0	0
MO161_4	Missouri	Sumac	1308	0	0	0	0	0	0	0	0	0	0	0	0	0	0	0	0	0	0	0	0	0	0	0	0	0	0	0	0	0	0	0	0	0	0	0	0	0	0	1301	0	0	0	0	0	0	0
[truncated: 11 more columns]
